# Supplementary material for: Plasmodium vivax Merozoite Surface Protein-3 (PvMSP3): Expression of an 11 Member Multigene Family in Blood-Stage Parasites
Source: PubMed Central journal article supplement (PMC3662707; doi:10.1371/journal.pone.0063888), 2013-05-23

## Figure S6

Cross-reactive antibodies present in the rPvMSP3 antiserum were removed by serial passage through affinity columns

# Figure S6

rPvMSP3 proteins used for rabbit serum production and affinity gel coupling

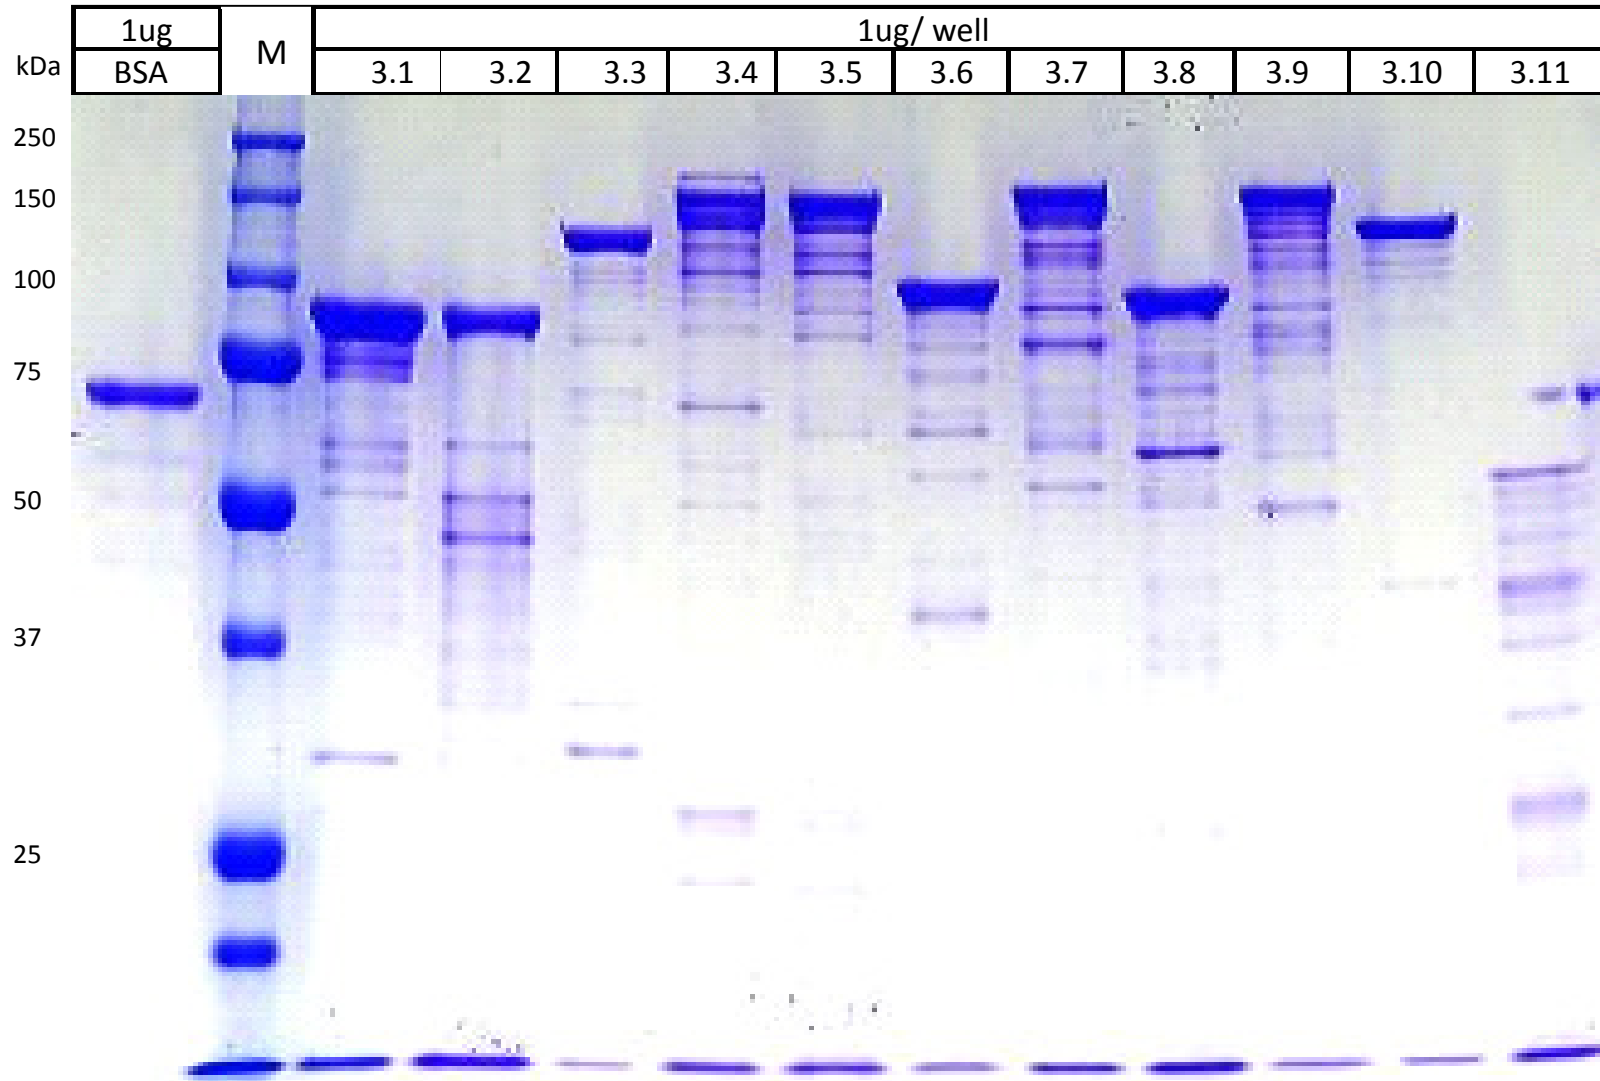

# Figure S6

Immunoblot using  $\alpha$ -rPvMSP3.1 Ab **before** affinity purification with rPvMSP3.2, rPvMSP3.8 and rPvMSP3.9 protein column

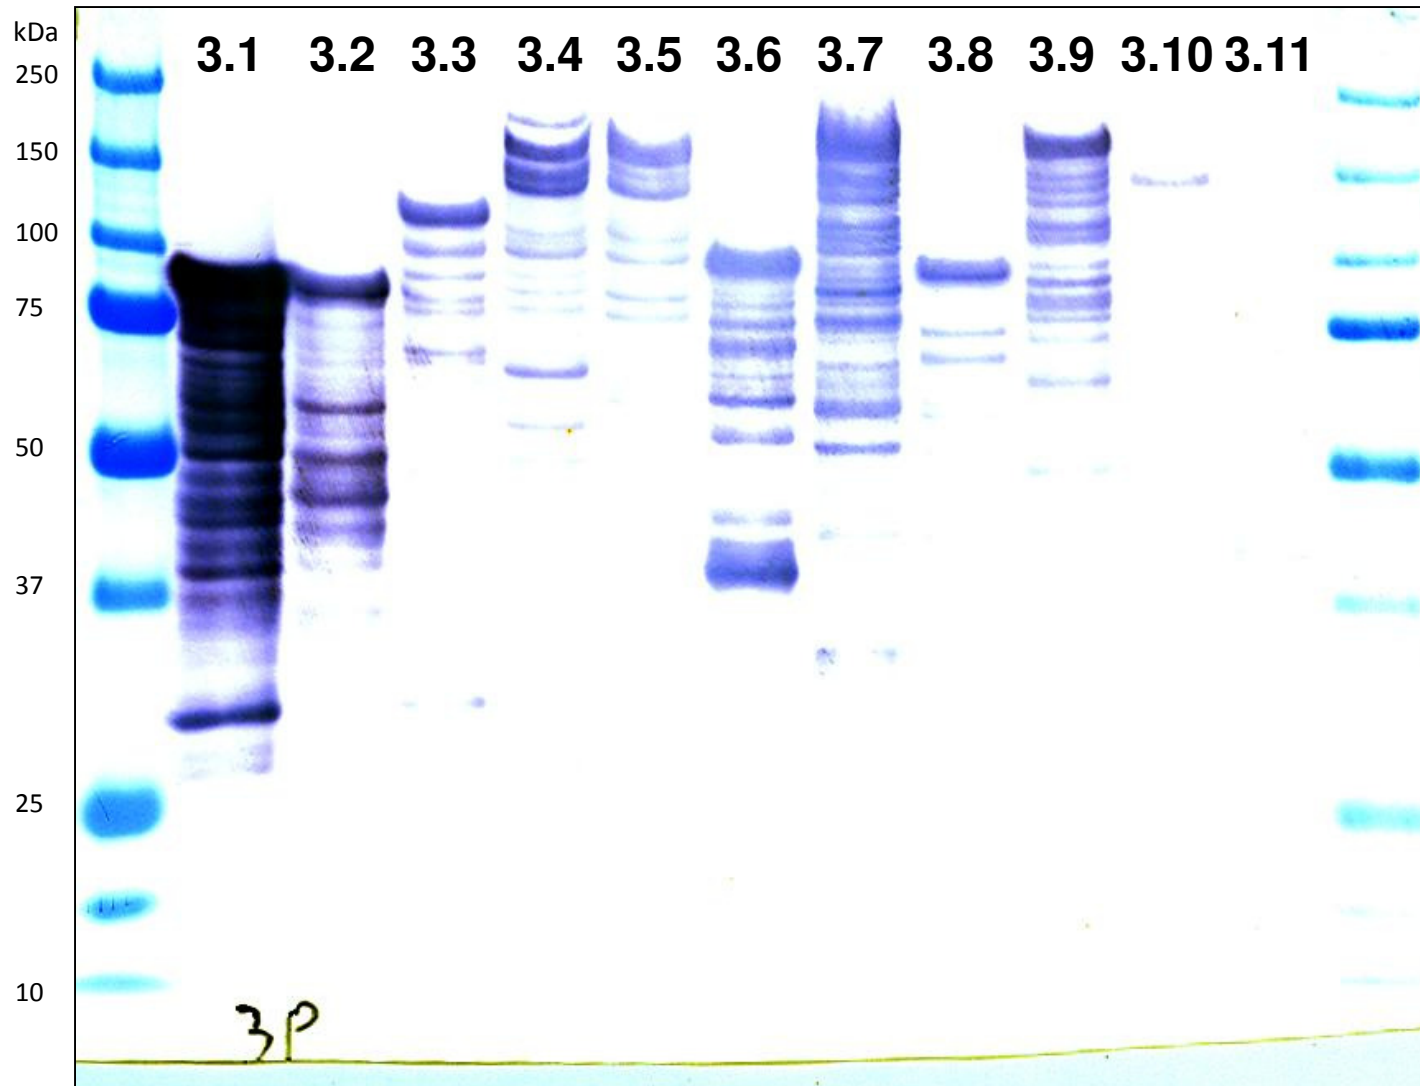

# Figure S6

Immunoblot using  $\alpha$ -rPvMSP3.1 Ab **after** affinity purification with rPvMSP3.2, rPvMSP3.8 and rPvMSP3.9 protein column

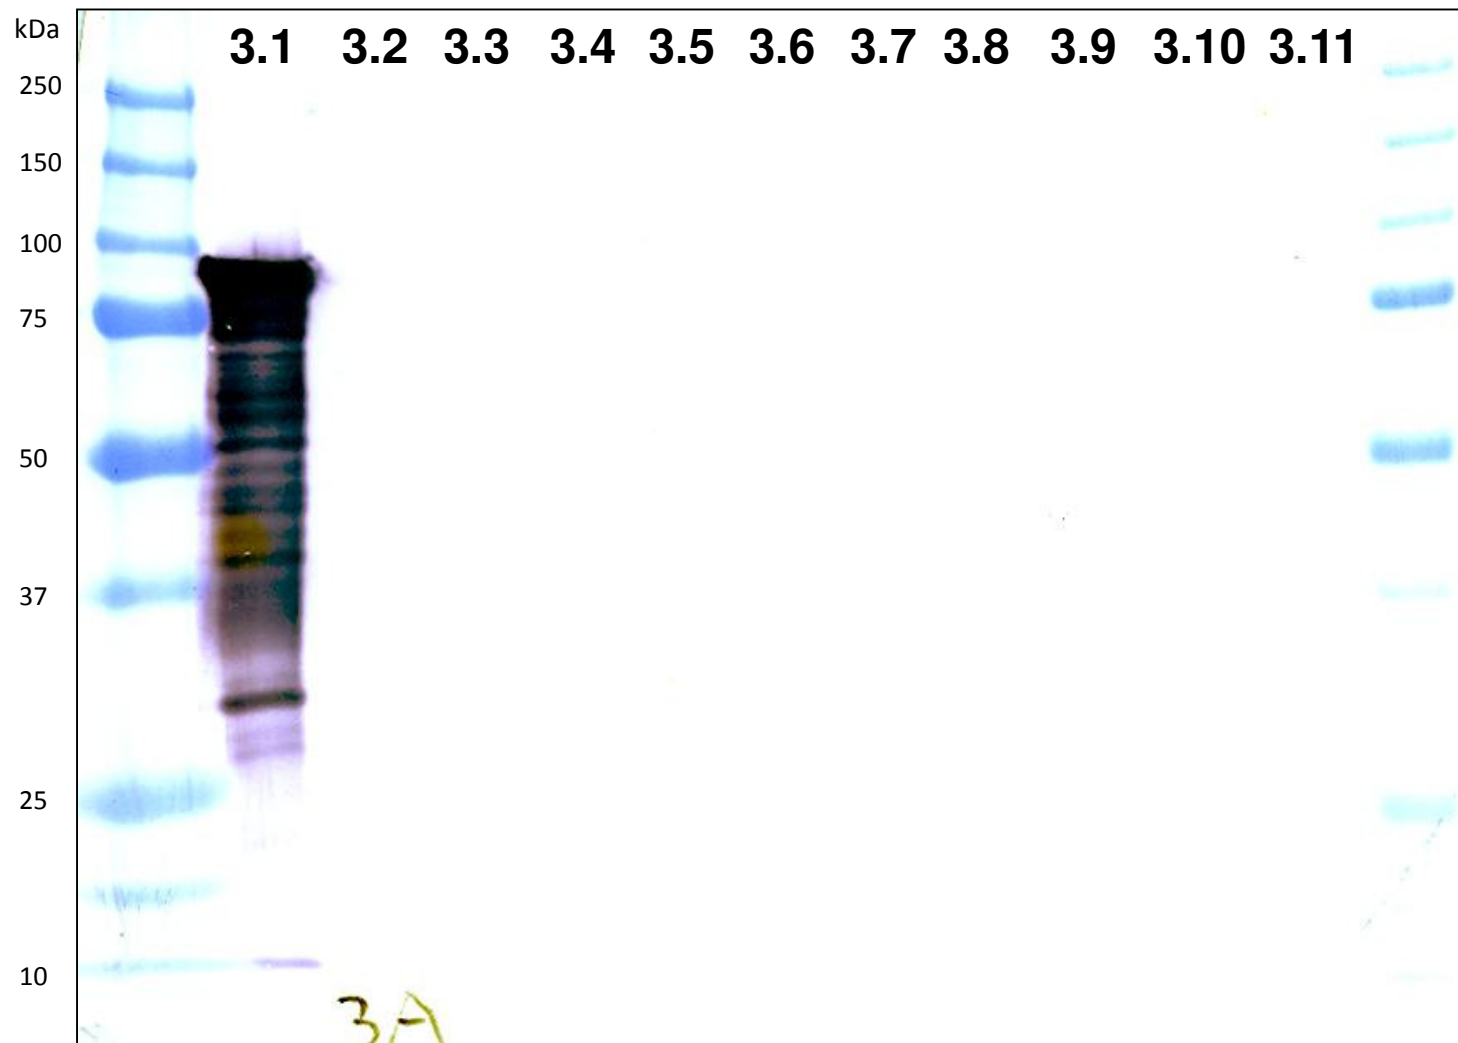

# Figure S6

Immunoblot using  $\alpha$ -rPvMSP3.2 Ab **before** affinity purification with rPvMSP3.1, rPvMSP3.6 and rPvMSP3.7 protein column

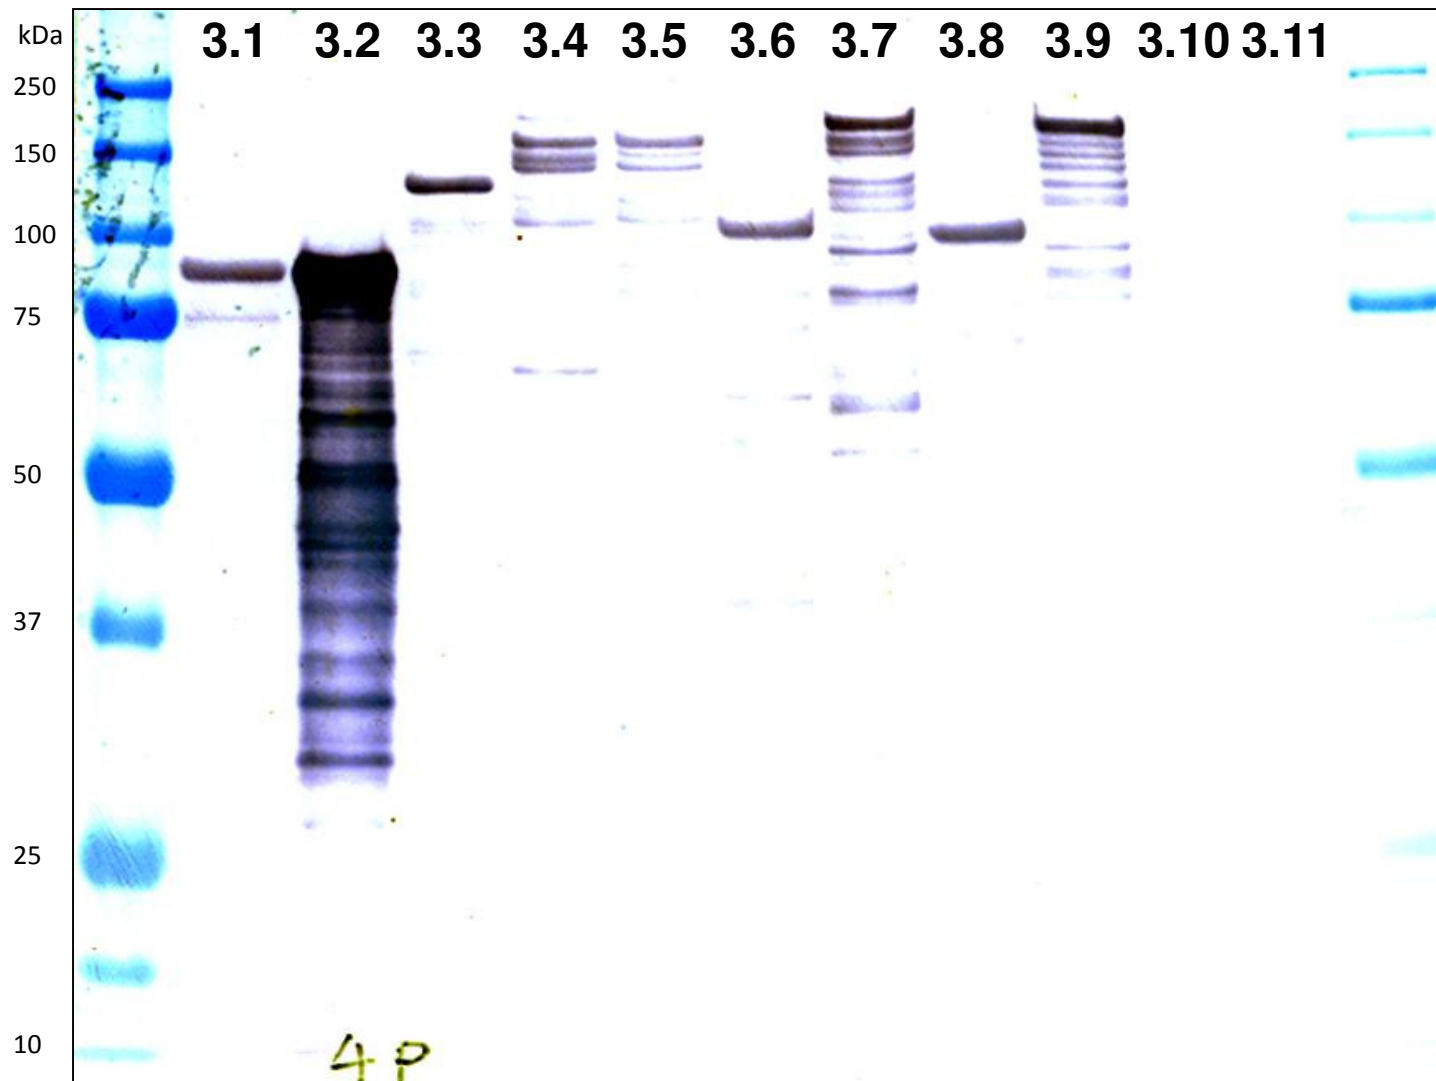

# Figure S6

Immunoblot using  $\alpha$ -rPvMSP3.2 Ab **after** affinity purification with rPvMSP3.1, rPvMSP3.6 and rPvMSP3.7 protein column

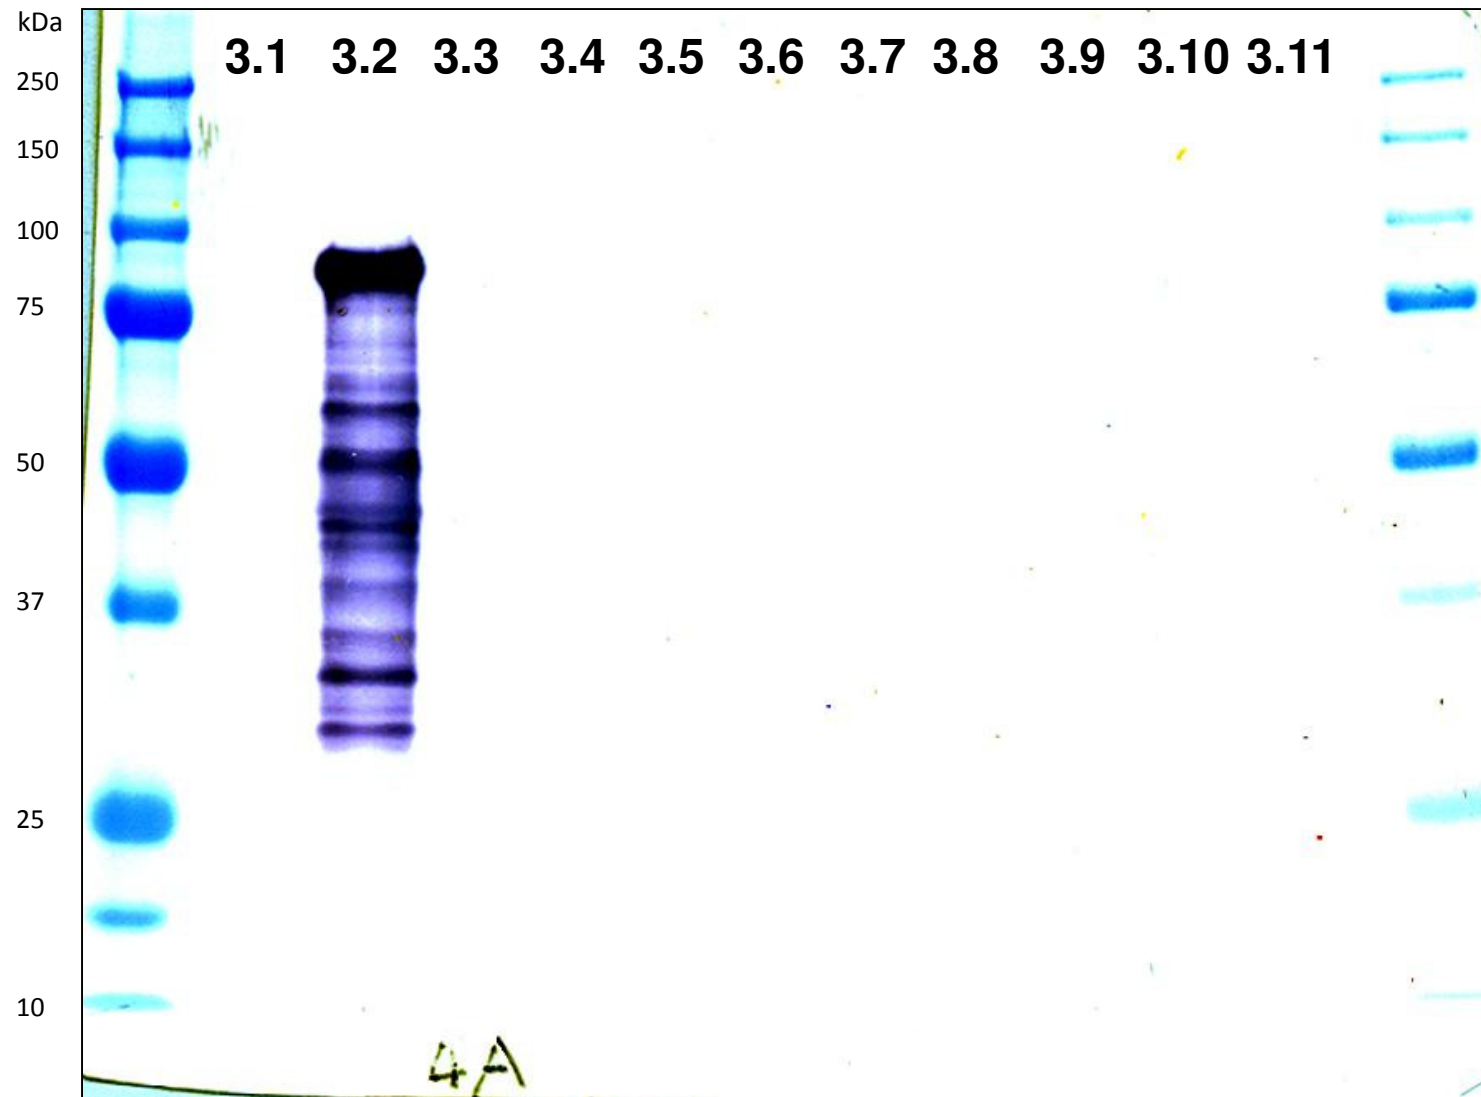

# Figure S6

Immunoblot using  $\alpha$ -rPvMSP3.3 Ab **before** affinity purification with rPvMSP3.5, rPvMSP3.7 and rPvMSP3.9 protein columns

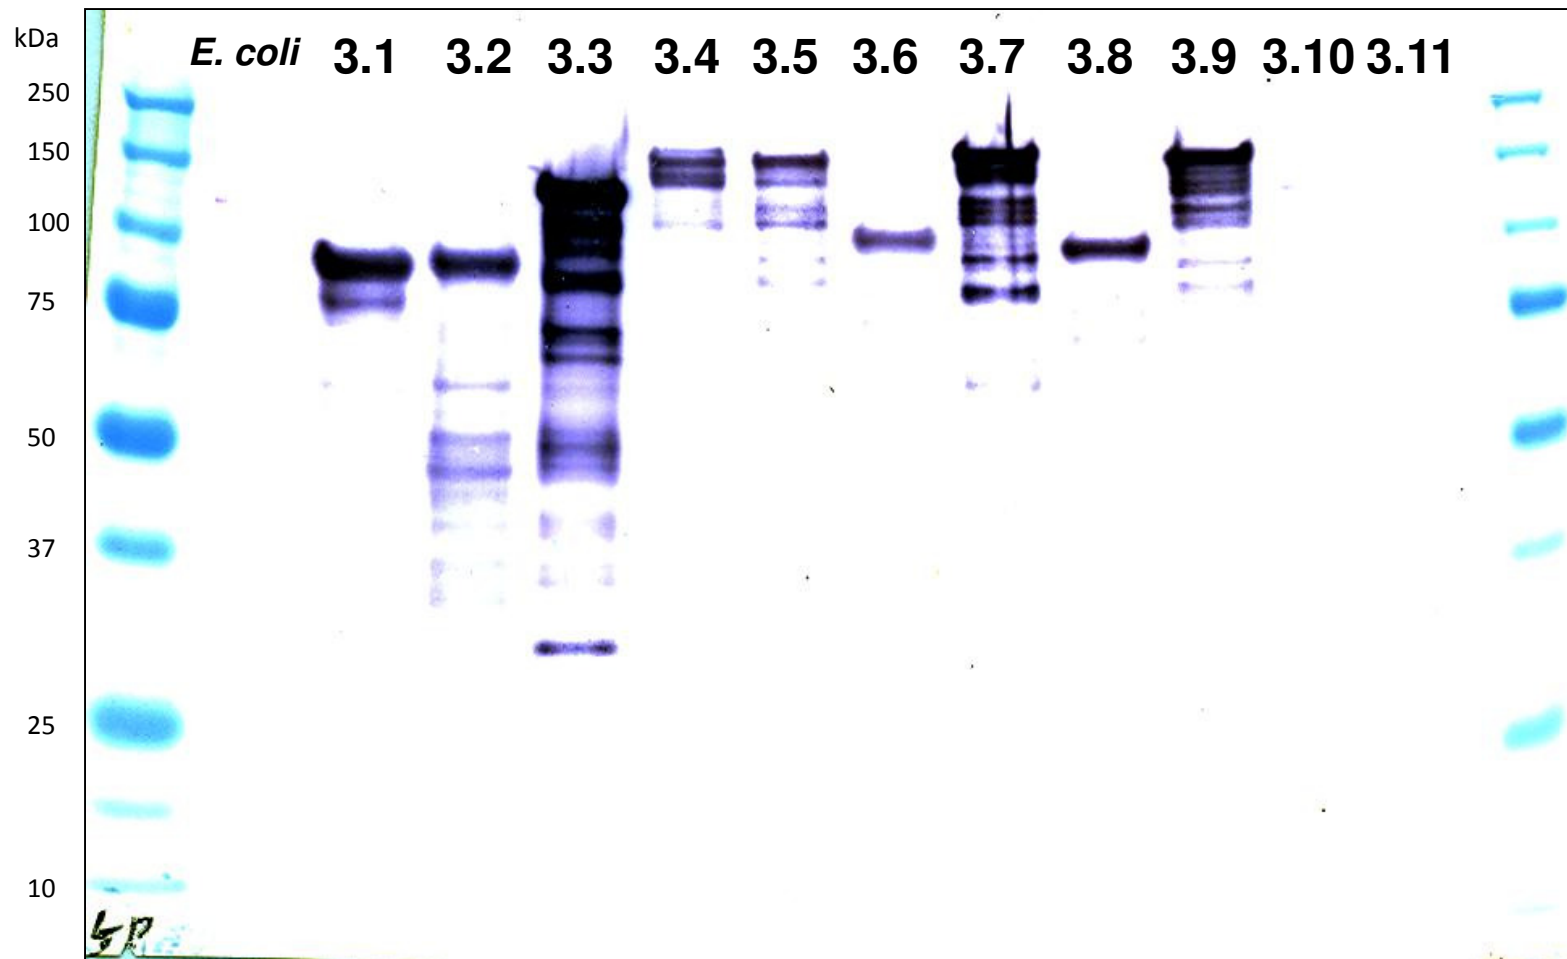

# Figure S6

Immunoblot using  $\alpha$ -rPvMSP3.3 Ab **after** affinity purification with rPvMSP3.5, rPvMSP3.7 and rPvMSP3.9 protein columns

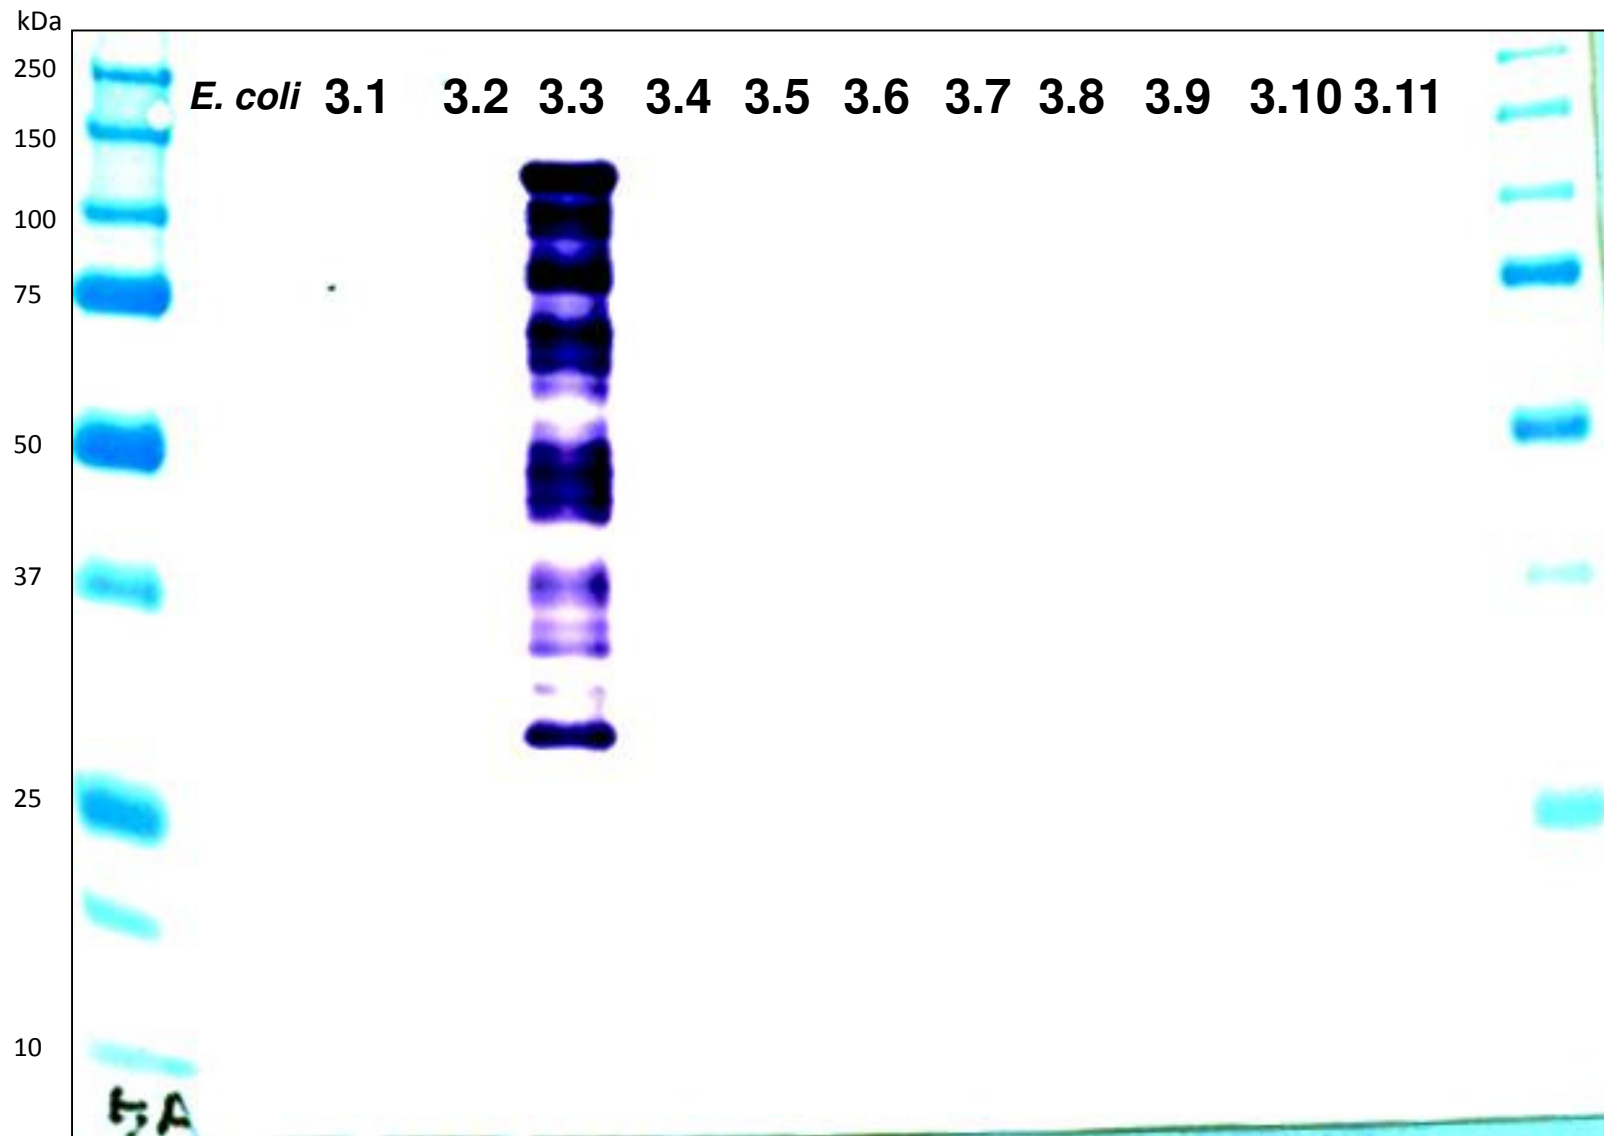



# Figure S6

Immunoblot using  $\alpha$ -rPvMSP3.4 Ab **before** affinity purification with rPvMSP3.3, rPvMSP3.6 and rPvMSP3.8 antigen columns

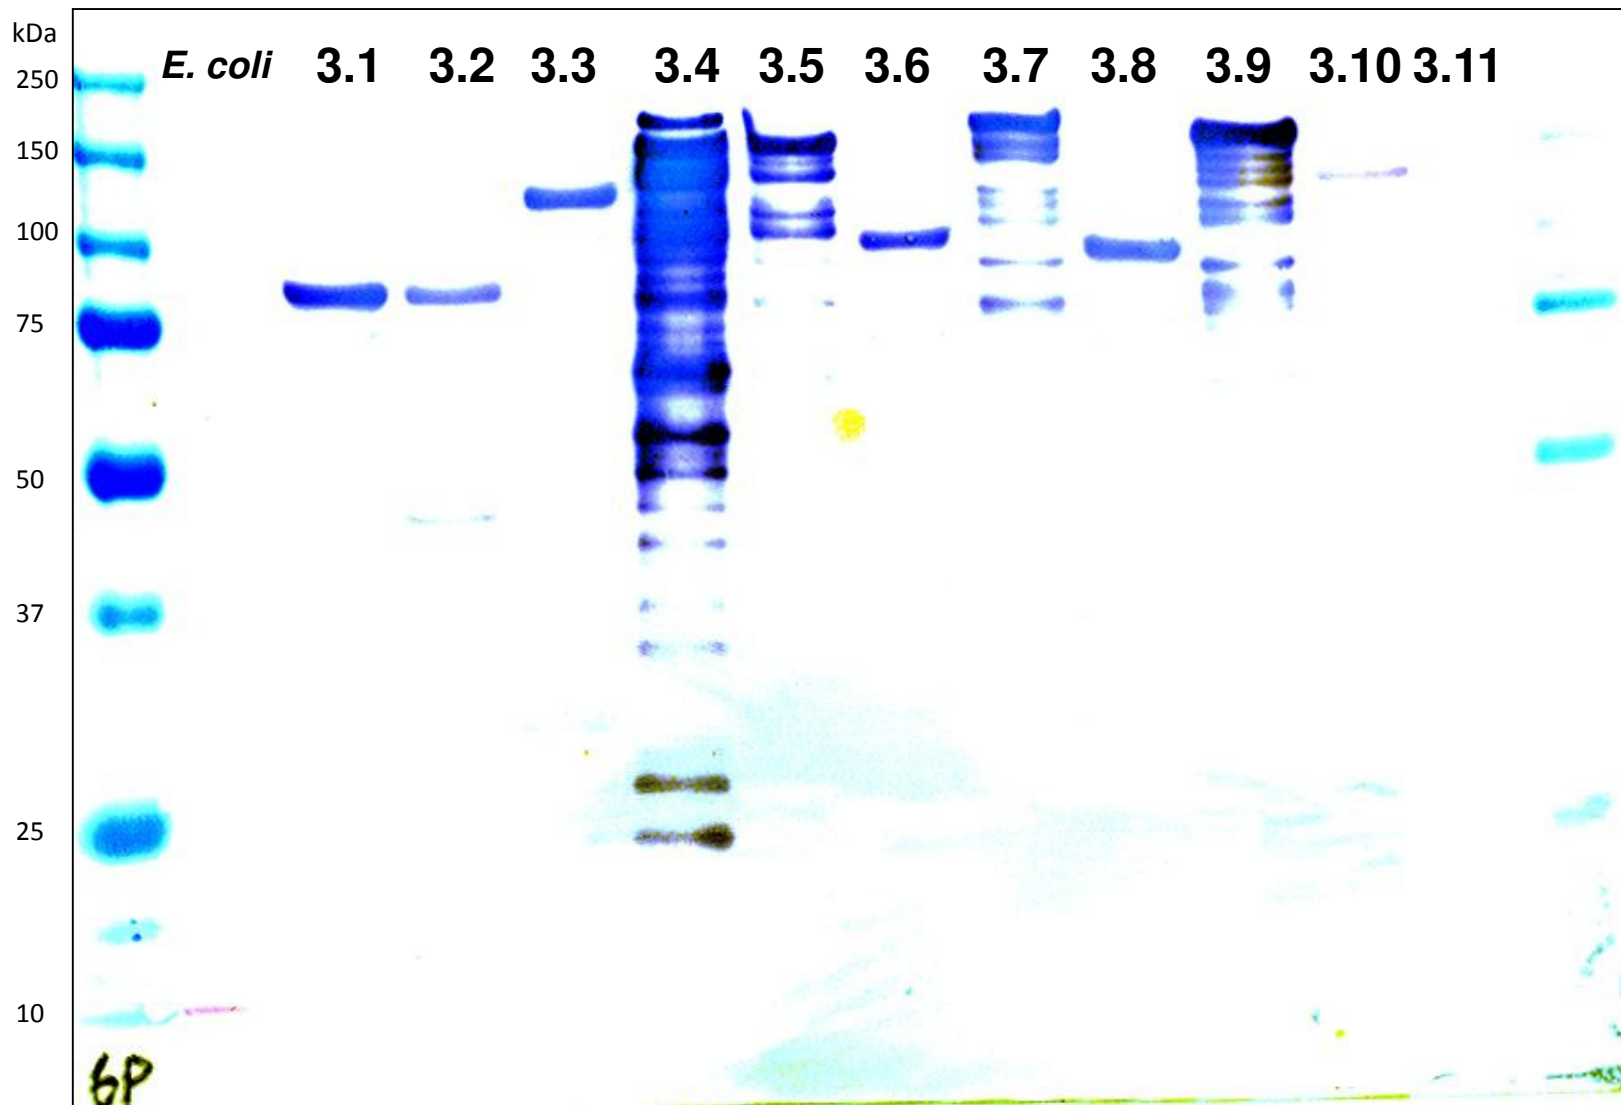

# Figure S6

Immunoblot using  $\alpha$ -rPvMSP3.4 Ab **after** affinity purification with rPvMSP3.3, rPvMSP3.6 and rPvMSP3.8 antigen columns

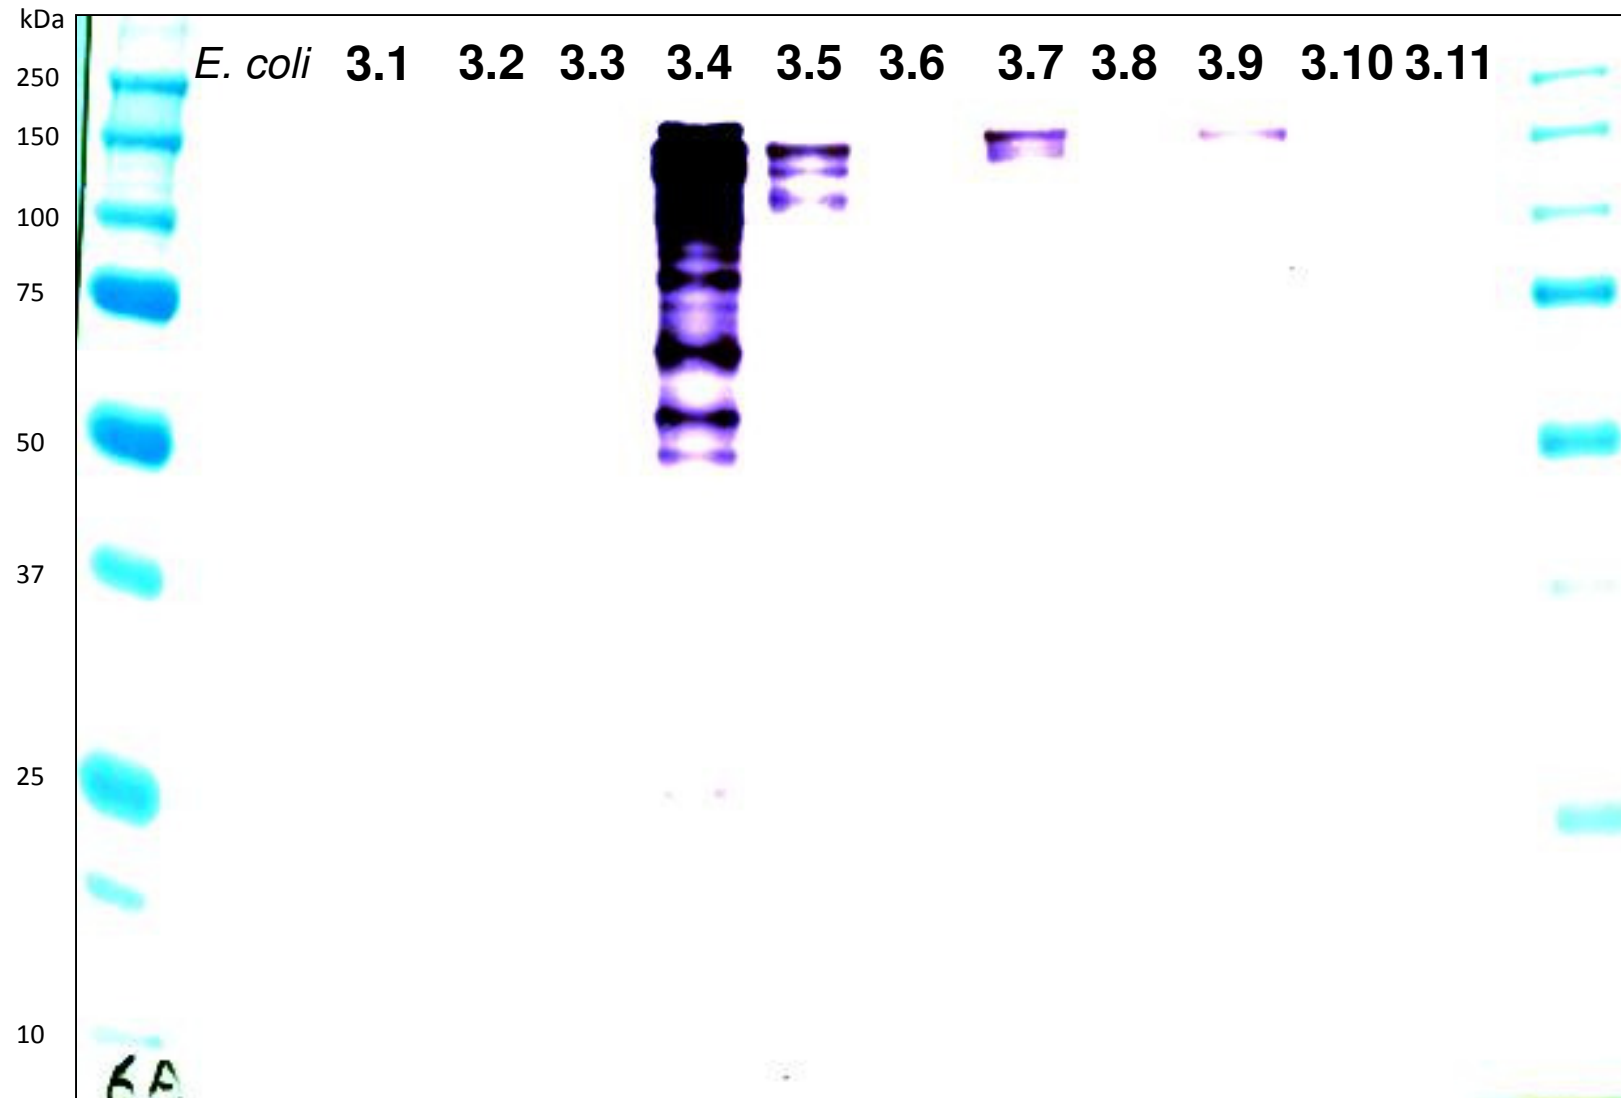

# Figure S6

Immunoblot using  $\alpha$ -rPvMSP3.4 Ab **after** secondary affinity purification with rPvMSP3.1, rPvMSP3.5, rPvMSP3.7 and rPvMSP3.9 antigen columns

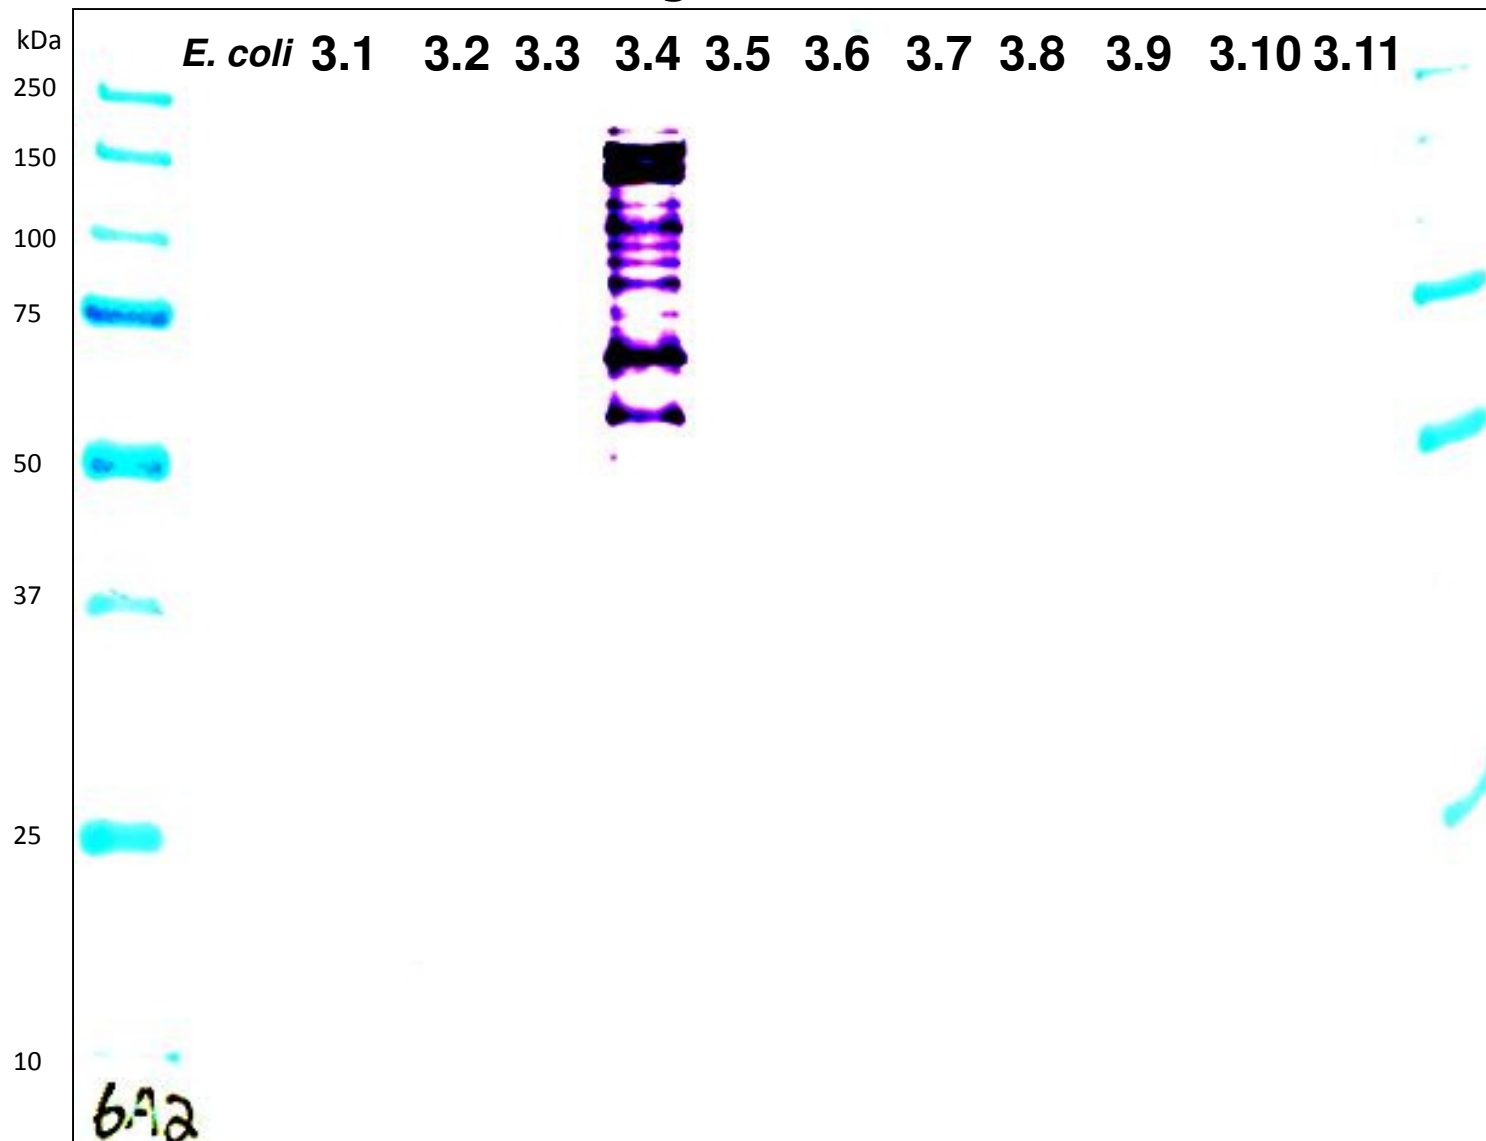

# Figure S6

Immunoblot using  $\alpha$ -rPvMSP3.5 Ab **before** affinity purification with rPvMSP3.1, rPvMSP3.2 and rPvMSP3.4 antigen columns

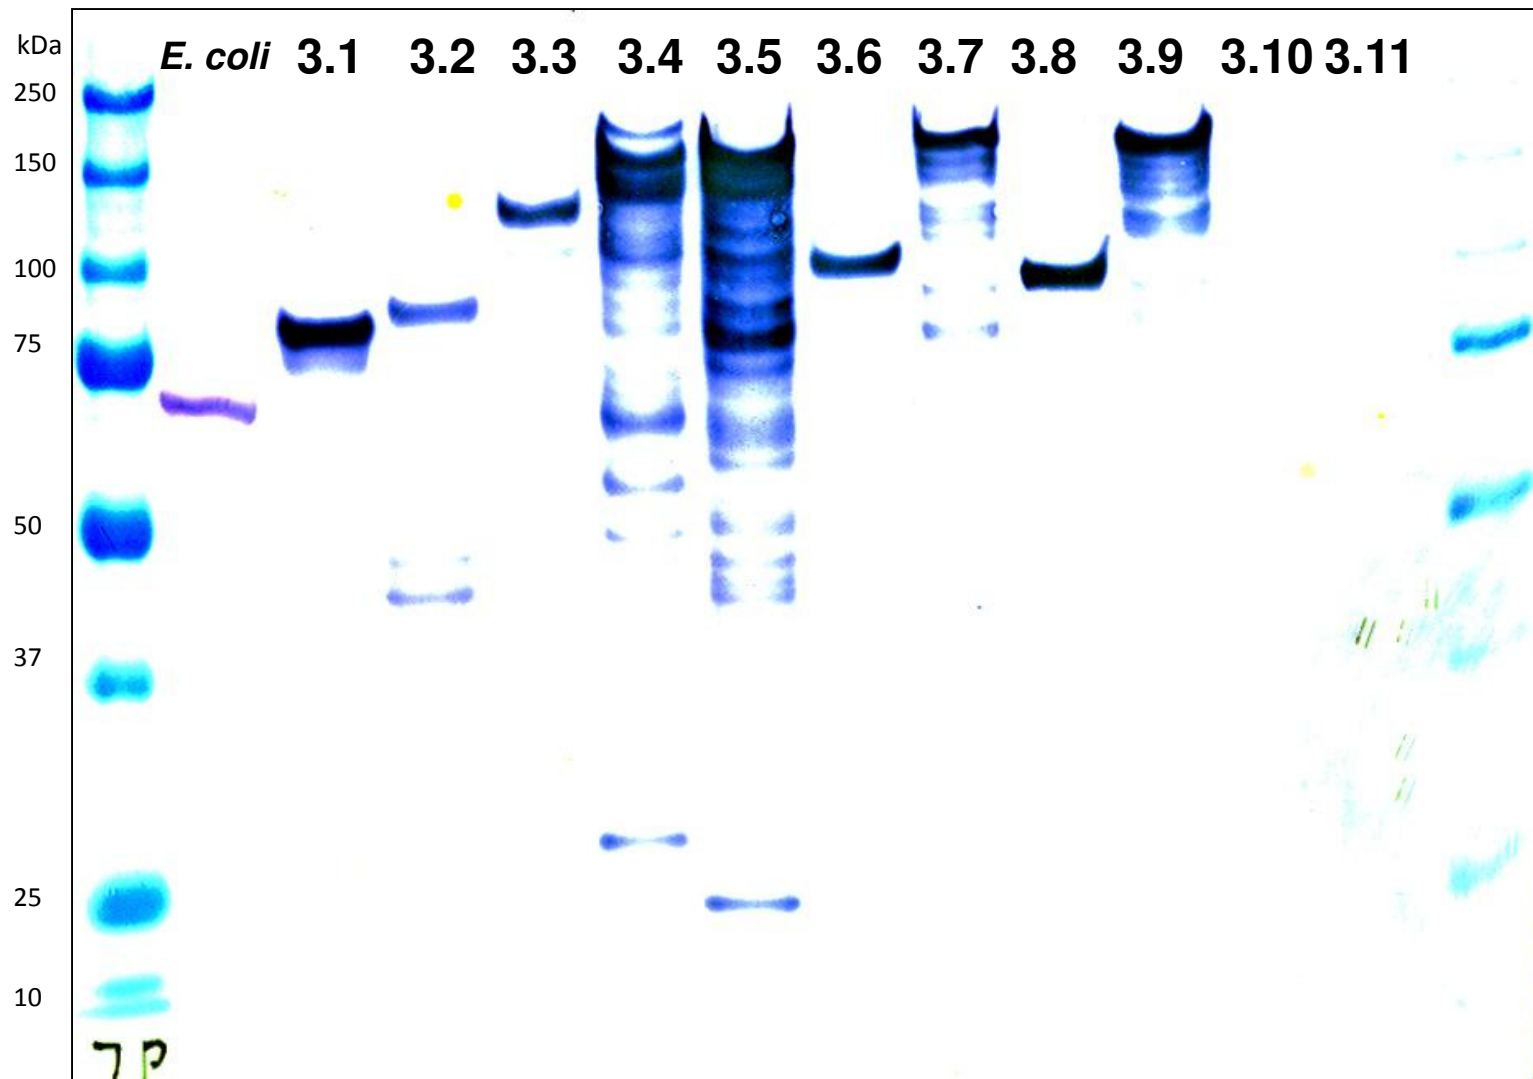

# Figure S6

Immunoblot using  $\alpha$ -rPvMSP3.5 Ab **after** affinity purification with rPvMSP3.1, rPvMSP3.2 and rPvMSP3.4 antigen columns

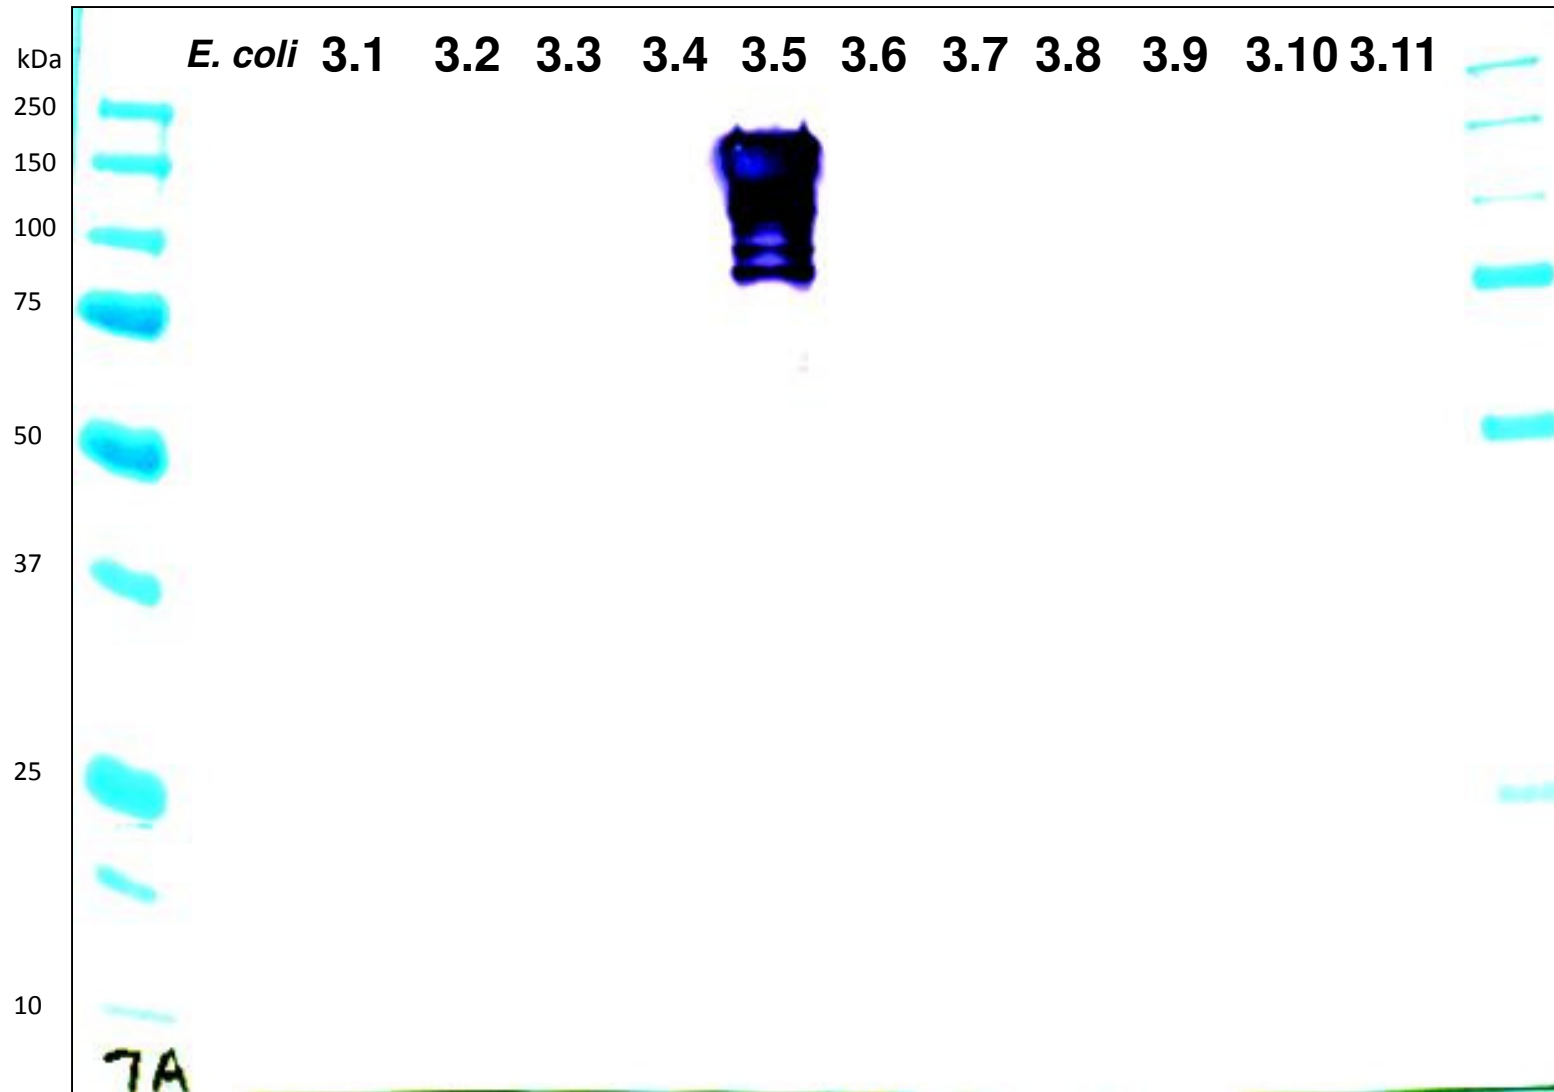

# Figure S6

Immunoblot using  $\alpha$ -rPvMSP3.6 Ab **before** affinity purification with rPvMSP3.1, rPvMSP3.7 and rPvMSP3.8 columns

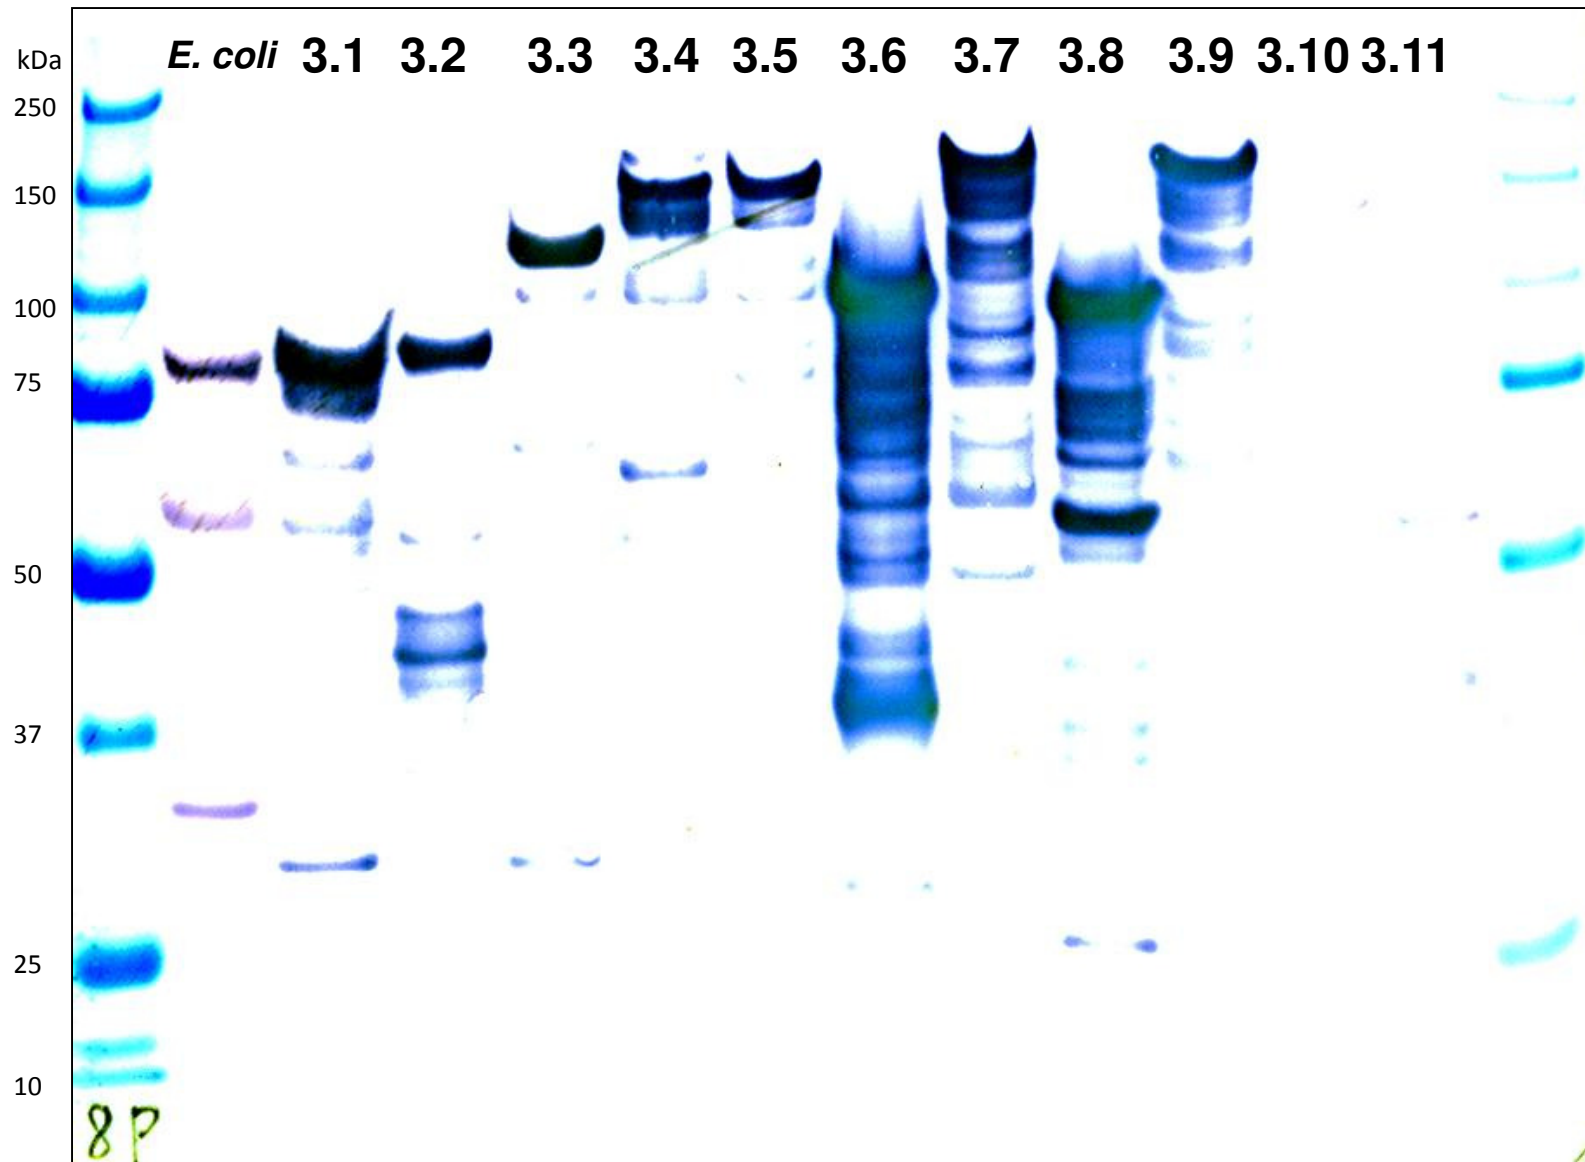

# Figure S6

Immunoblot using  $\alpha$ -rPvMSP3.6 Ab **after** affinity purification with rPvMSP3.1, rPvMSP3.7 and rPvMSP3.8 columns

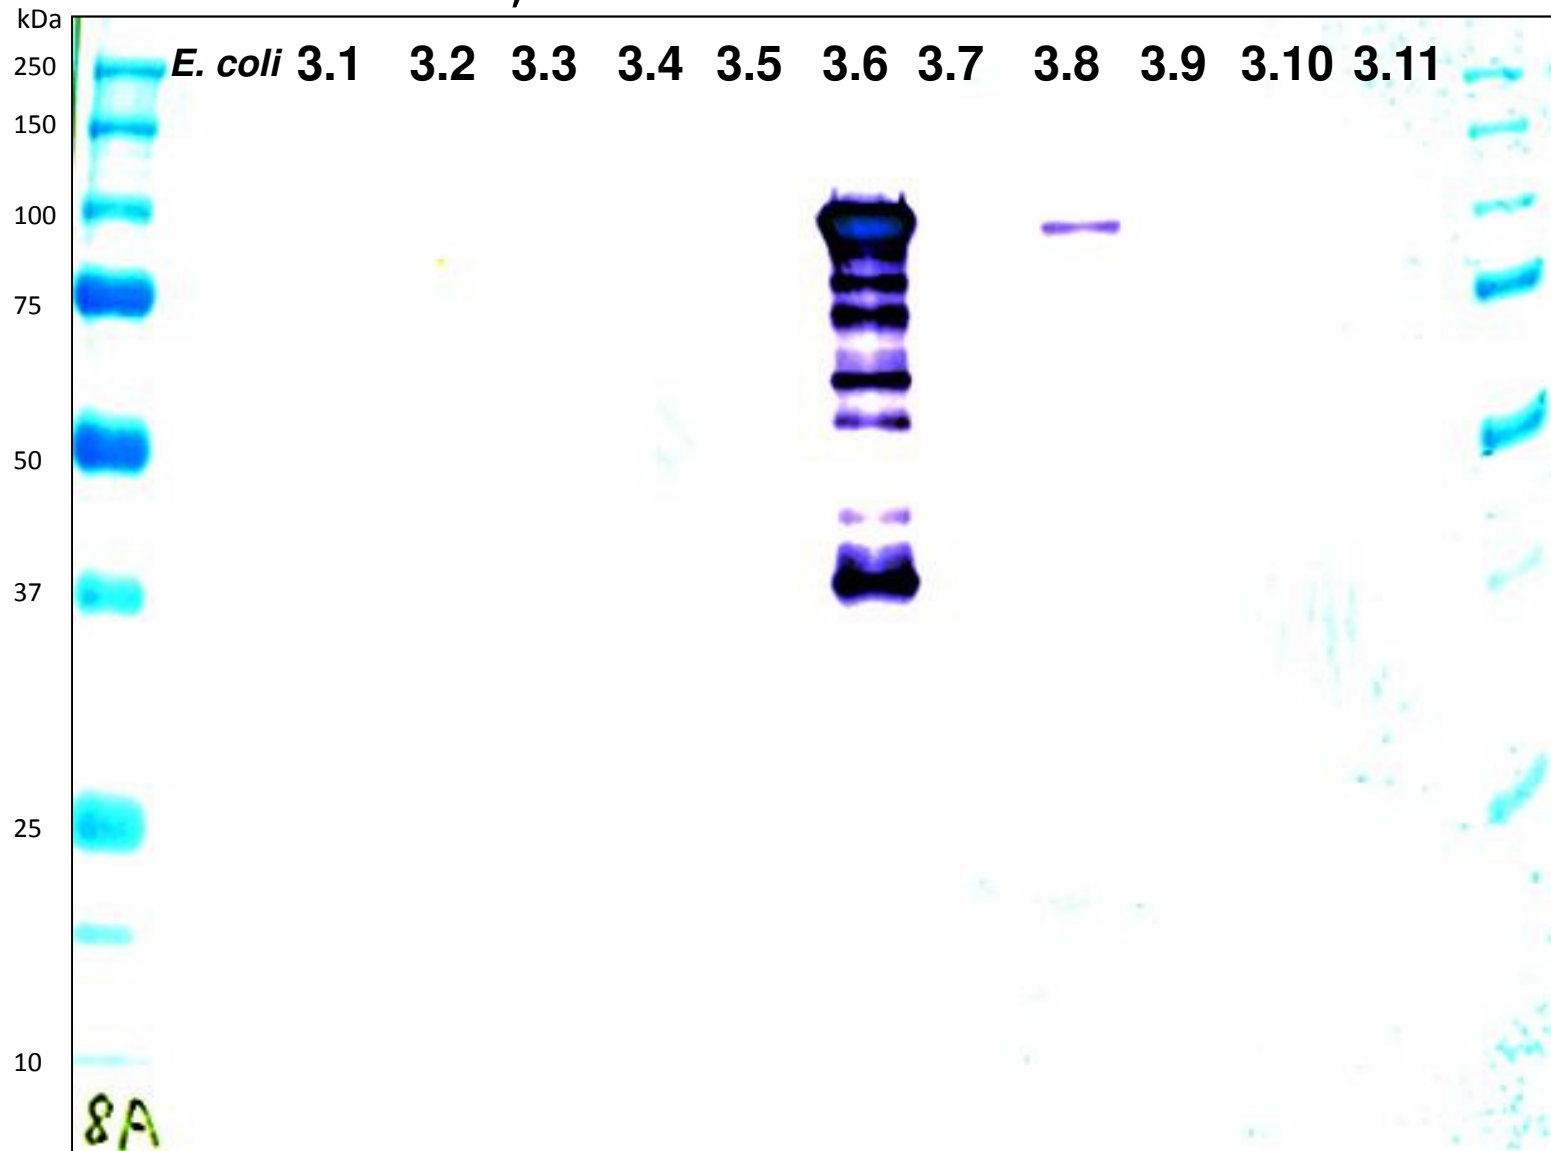

# Figure S6

Immunoblot using  $\alpha$ -rPvMSP3.7 Ab **before** affinity purification with rPvMSP3.4, rPvMSP3.5 and rPvMSP3.9 columns

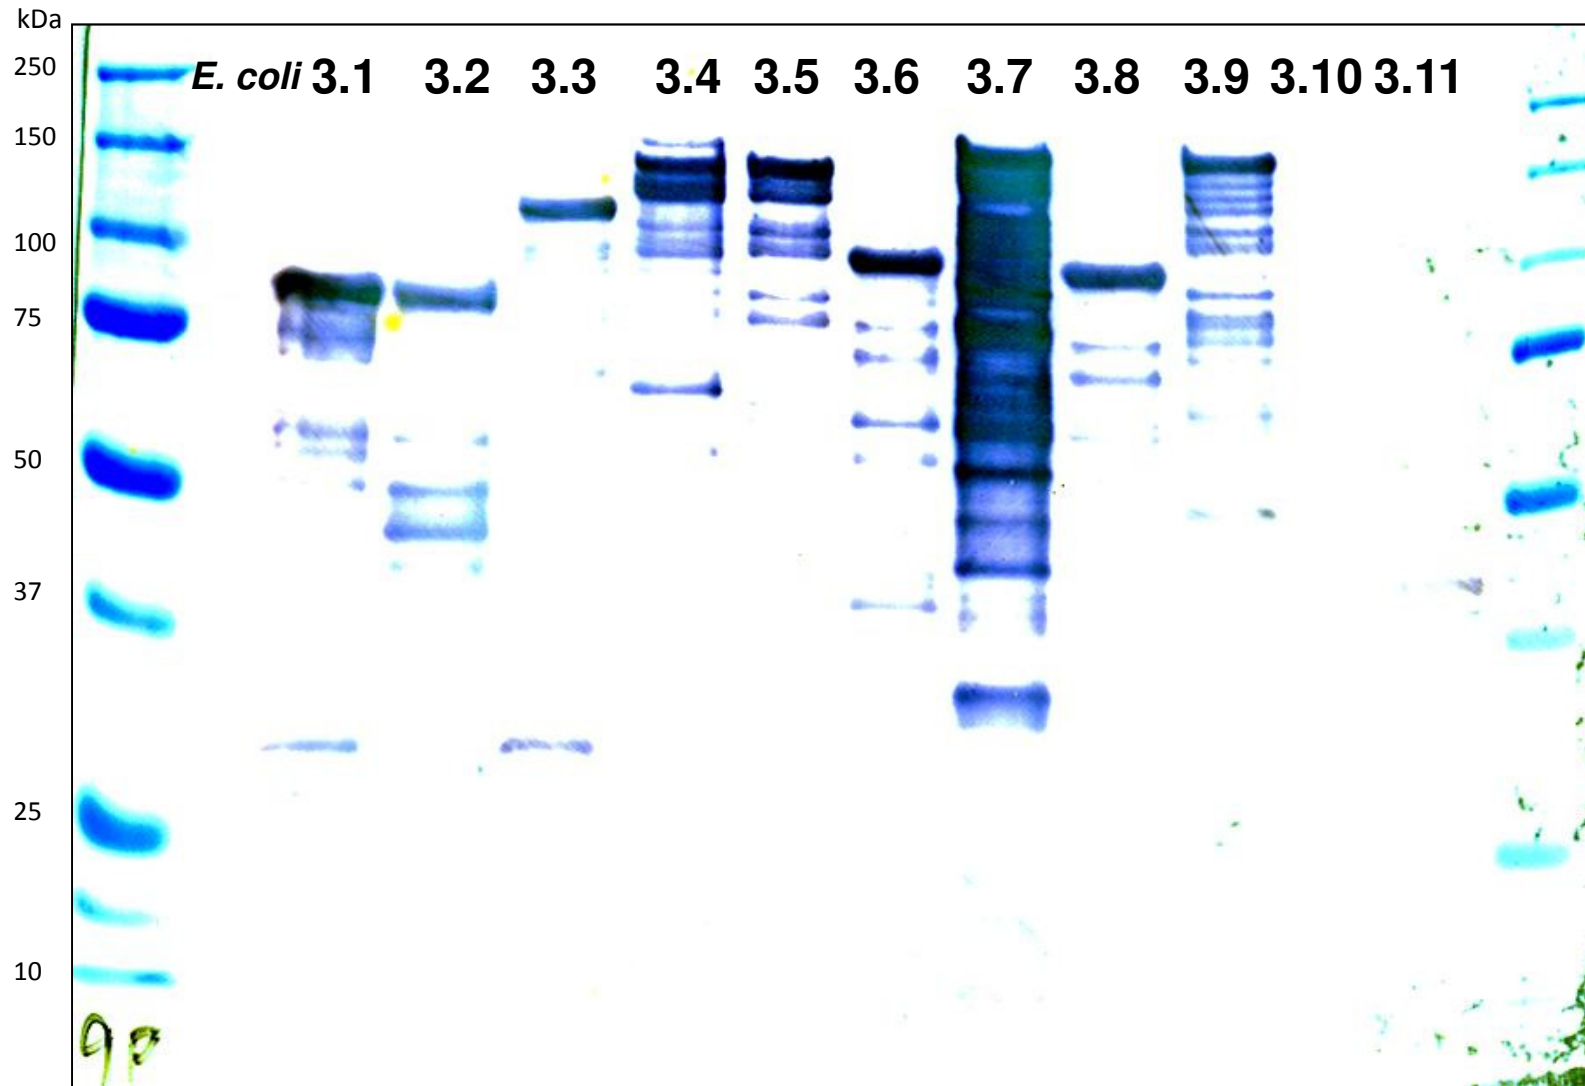



# Figure S6

Immunoblot using  $\alpha$ -rPvMSP3.7 Ab **after** affinity purification with rPvMSP3.4, rPvMSP3.5 and rPvMSP3.9 columns

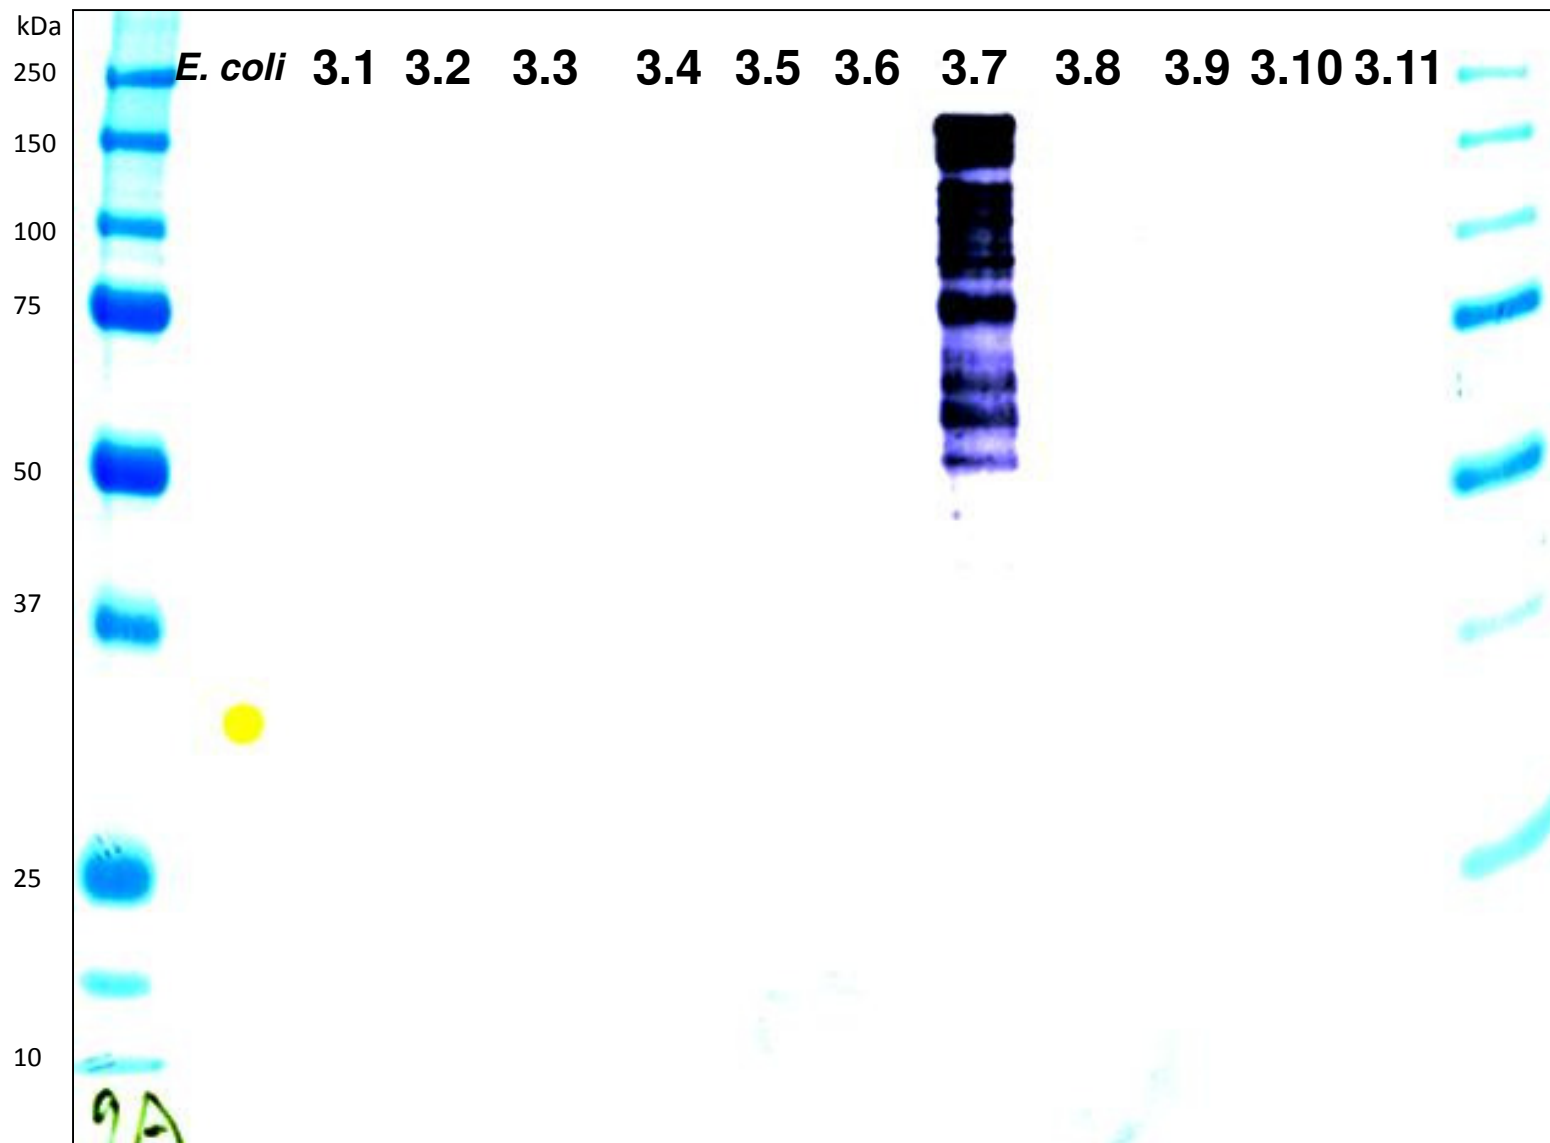

# Figure S6

Immunoblot using  $\alpha$ -rPvMSP3.8 Ab **before** affinity purification with rPvMSP3.2, rPvMSP3.3 and rPvMSP3.6 columns

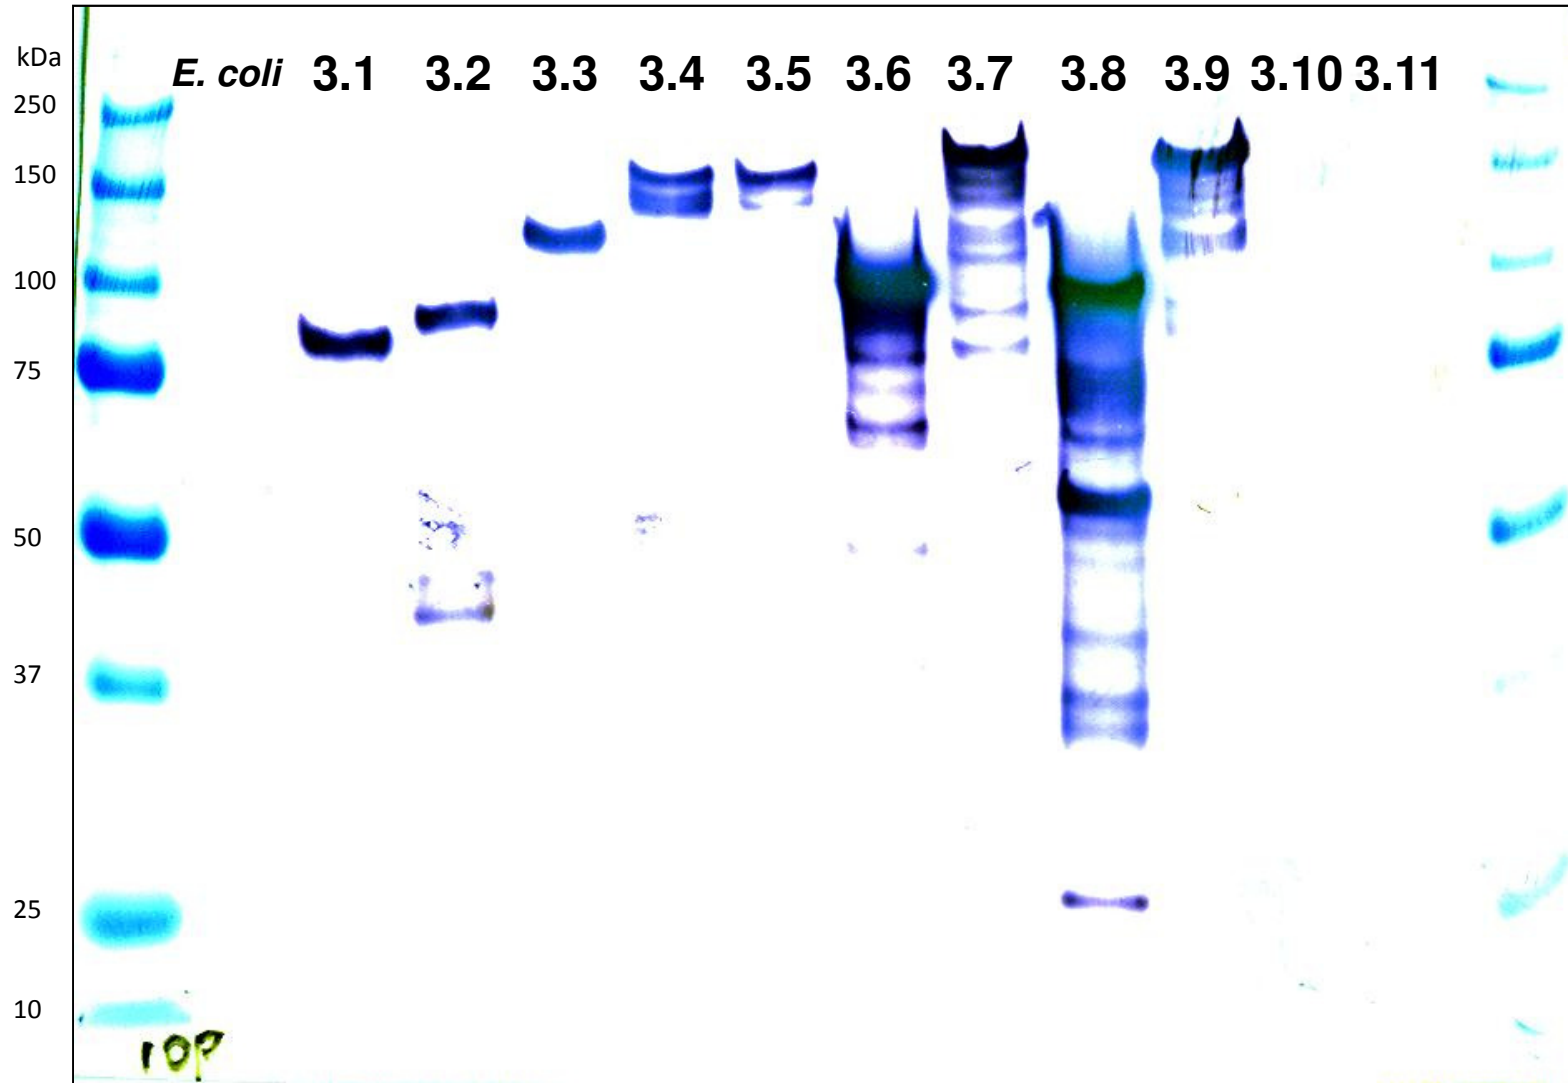

# Figure S6

Immunoblot using  $\alpha$ -rPvMSP3.8 Ab **after** affinity purification with rPvMSP3.2, rPvMSP3.3 and rPvMSP3.6 columns

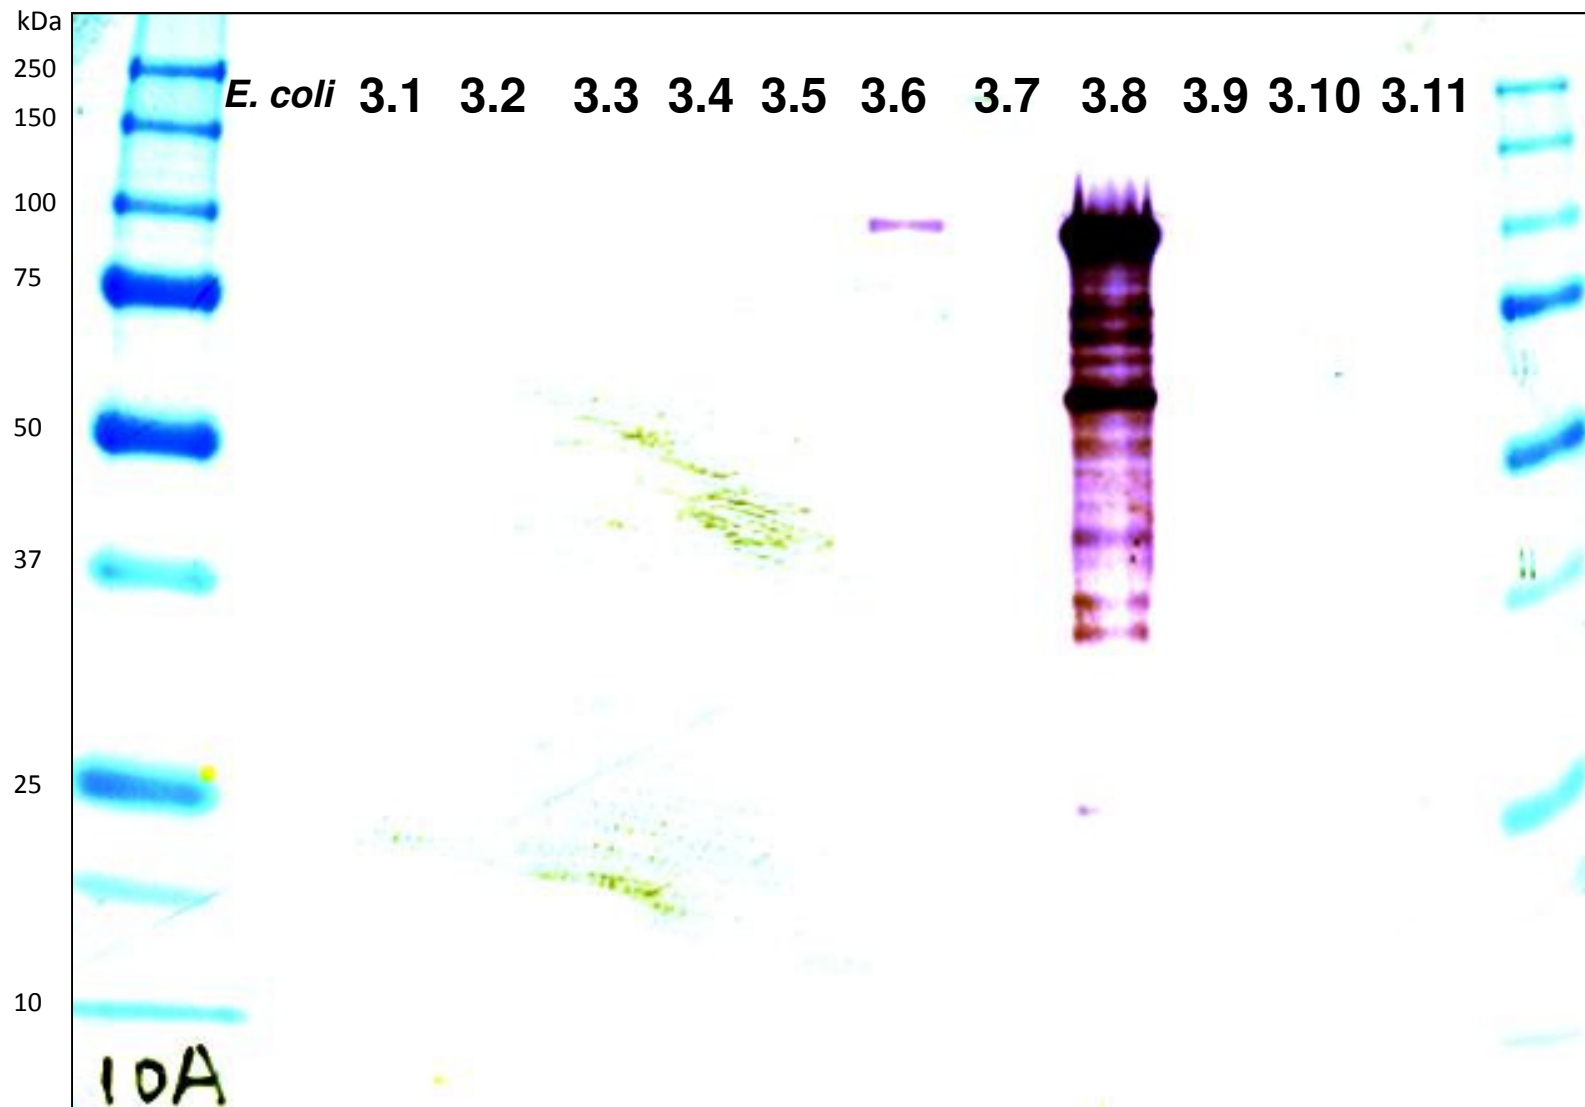

# Figure S6

Immunoblot using  $\alpha$ -rPvMSP3.8 Ab **after** secondary affinity purification with rPvMSP3.6 antigen columns

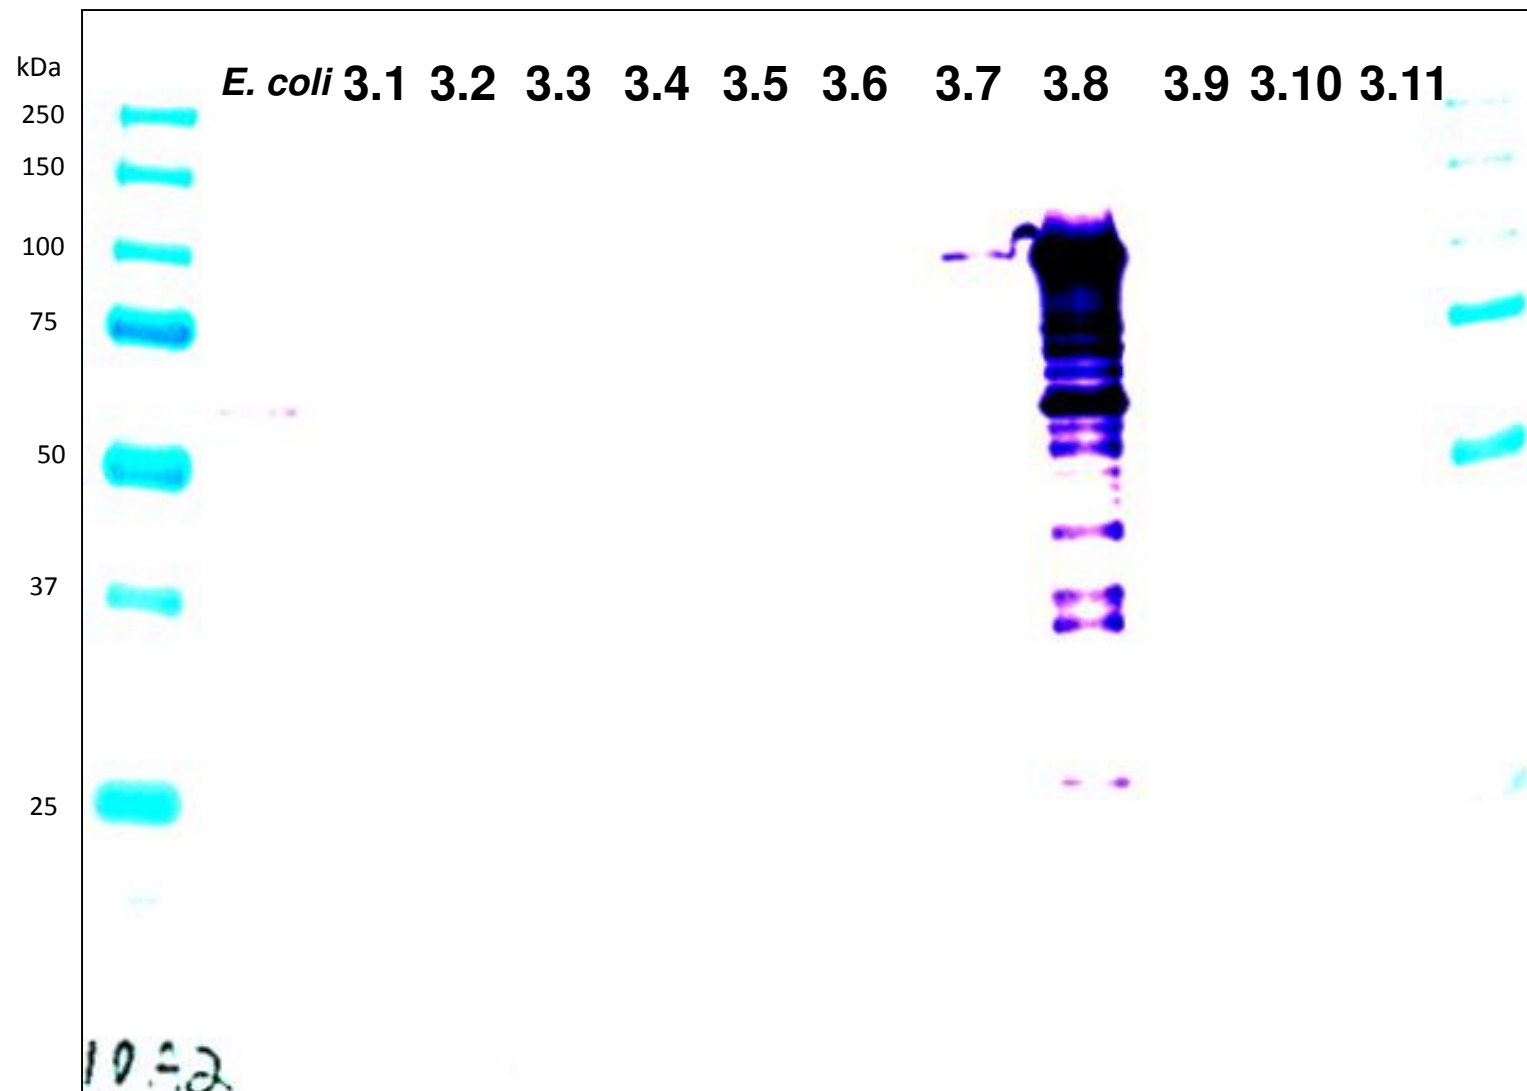

# Figure S6

Immunoblot using  $\alpha$ -rPvMSP3.9 Ab **before** affinity purification with rPvMSP3.4, rPvMSP3.5 and rPvMSP3.7 columns

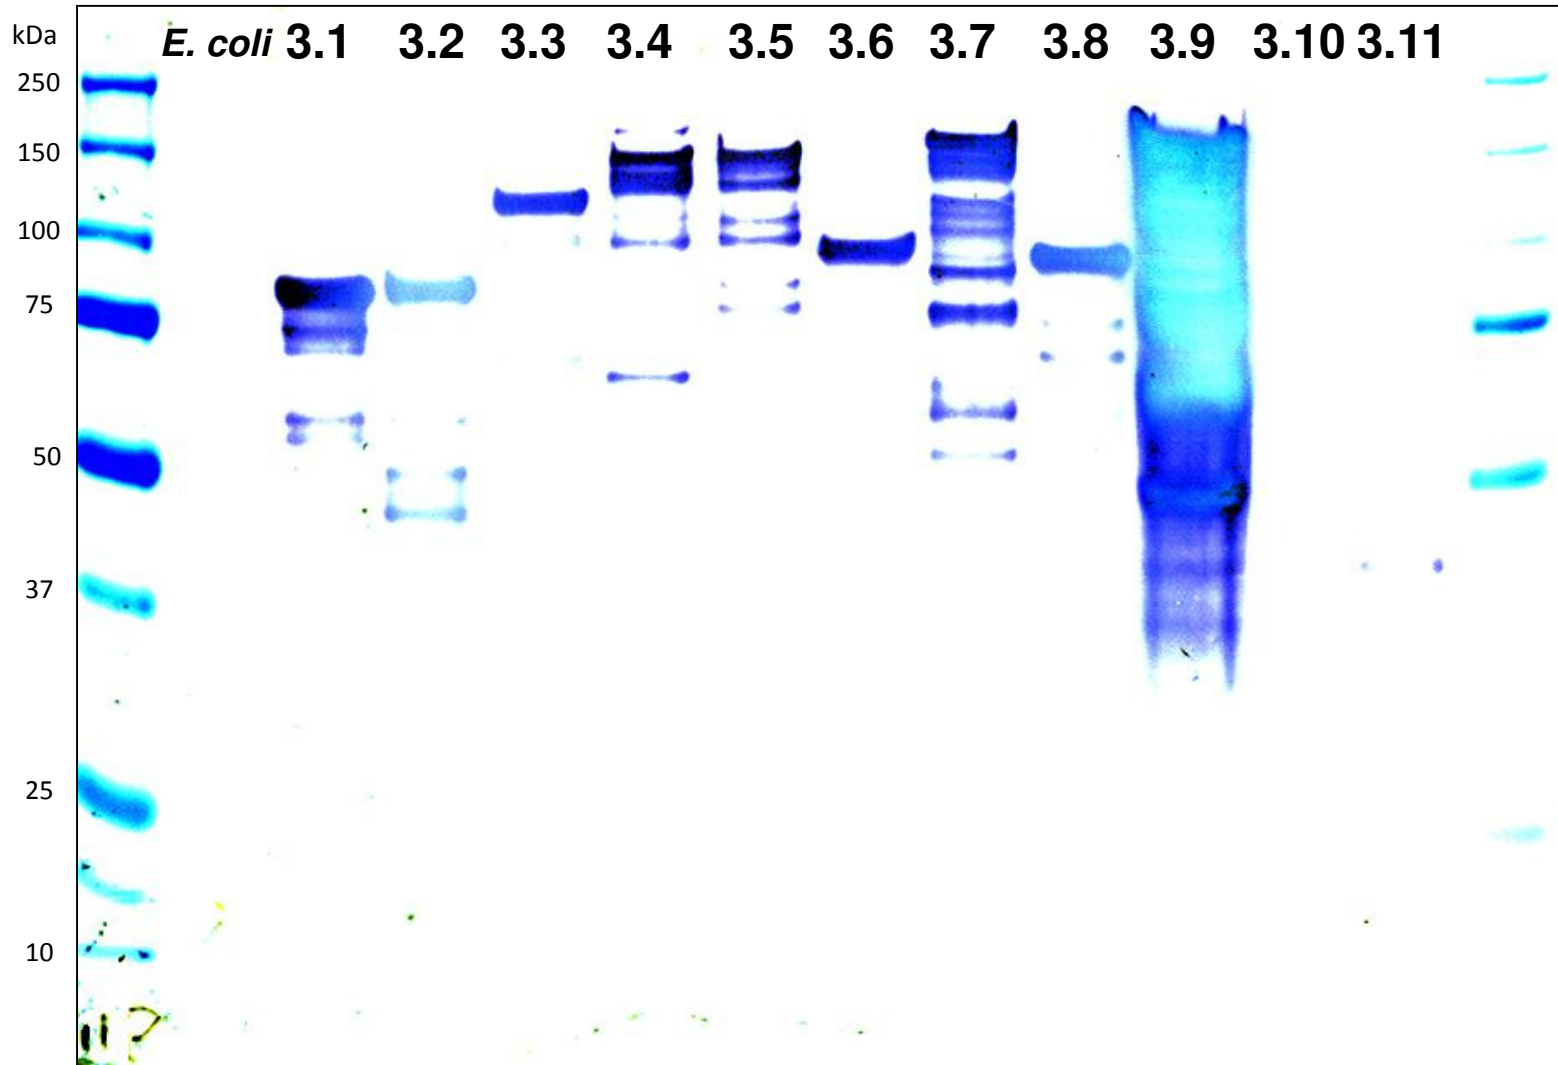

# Figure S6

Immunoblot using  $\alpha$ -rPvMSP3.9 Ab **after** affinity purification with rPvMSP3.4, rPvMSP3.5 and rPvMSP3.7 columns

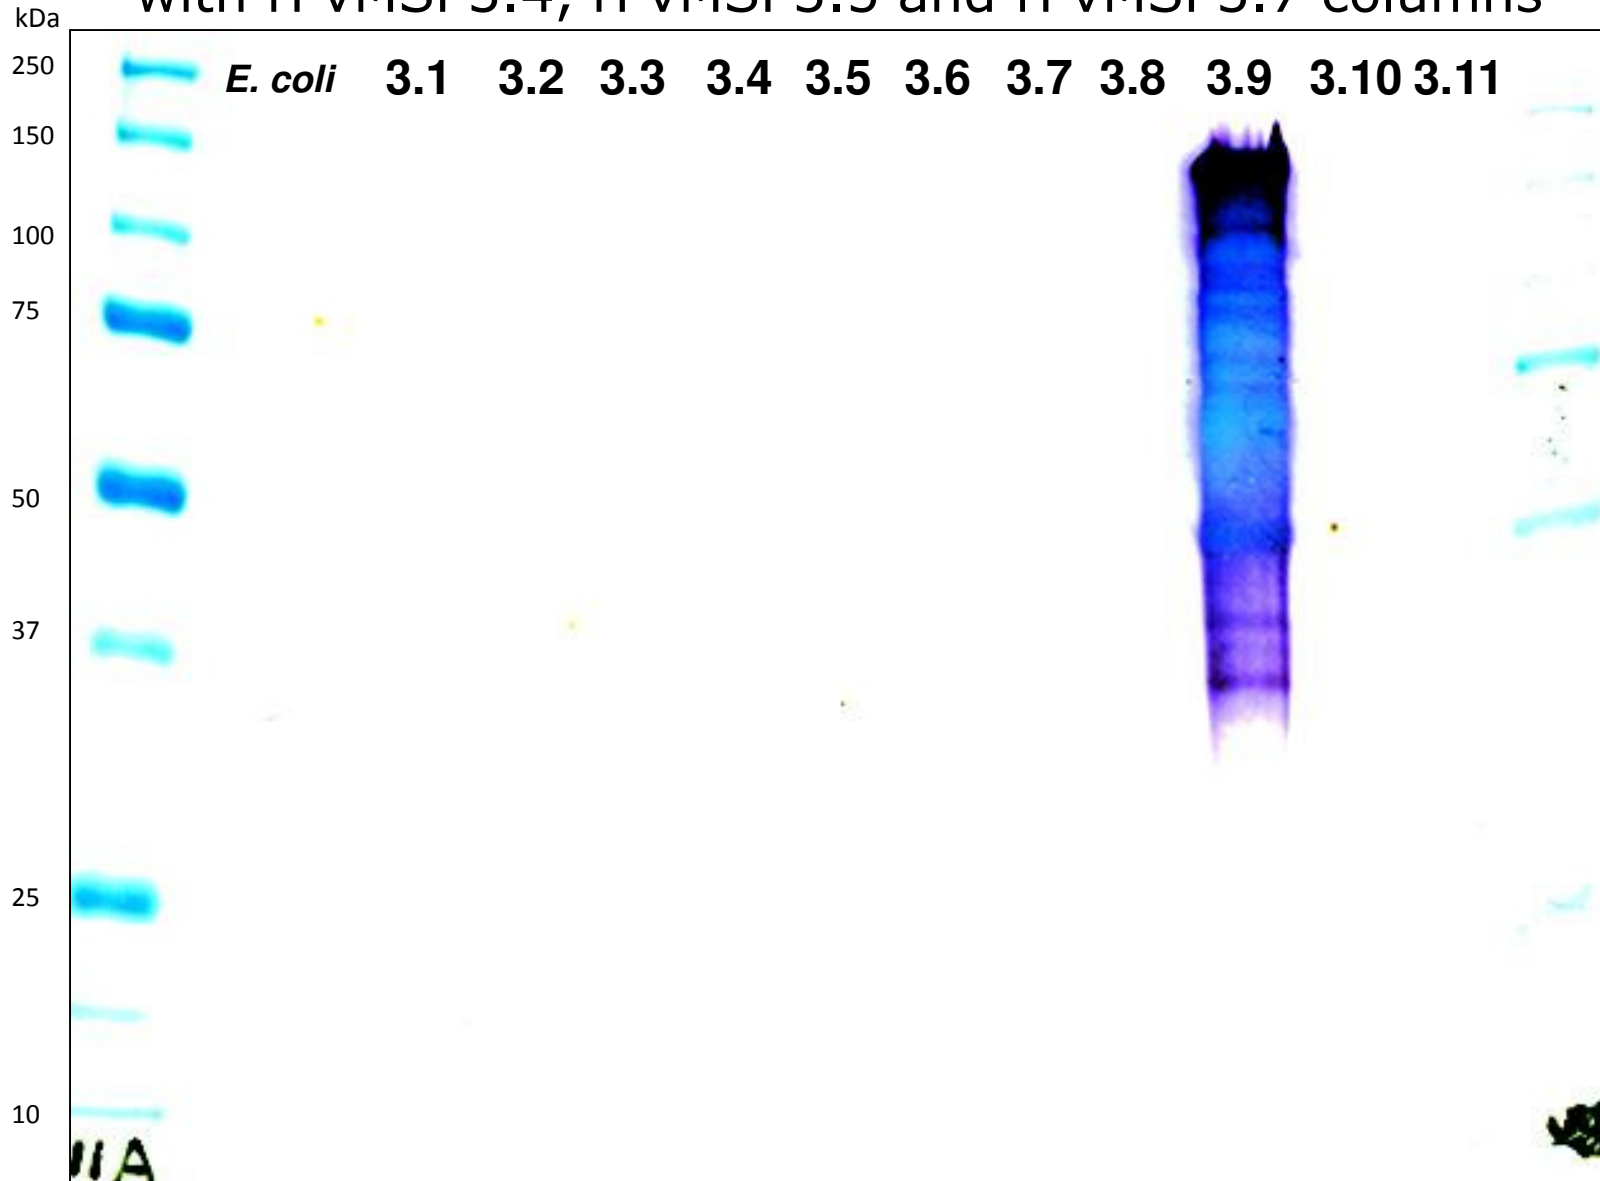

# Figure S6

Immunoblot using  $\alpha$ -rPvMSP3.10 Ab **before** affinity purification with rPvMSP3.1, rPvMSP3.8 and rPvMSP3.9 columns

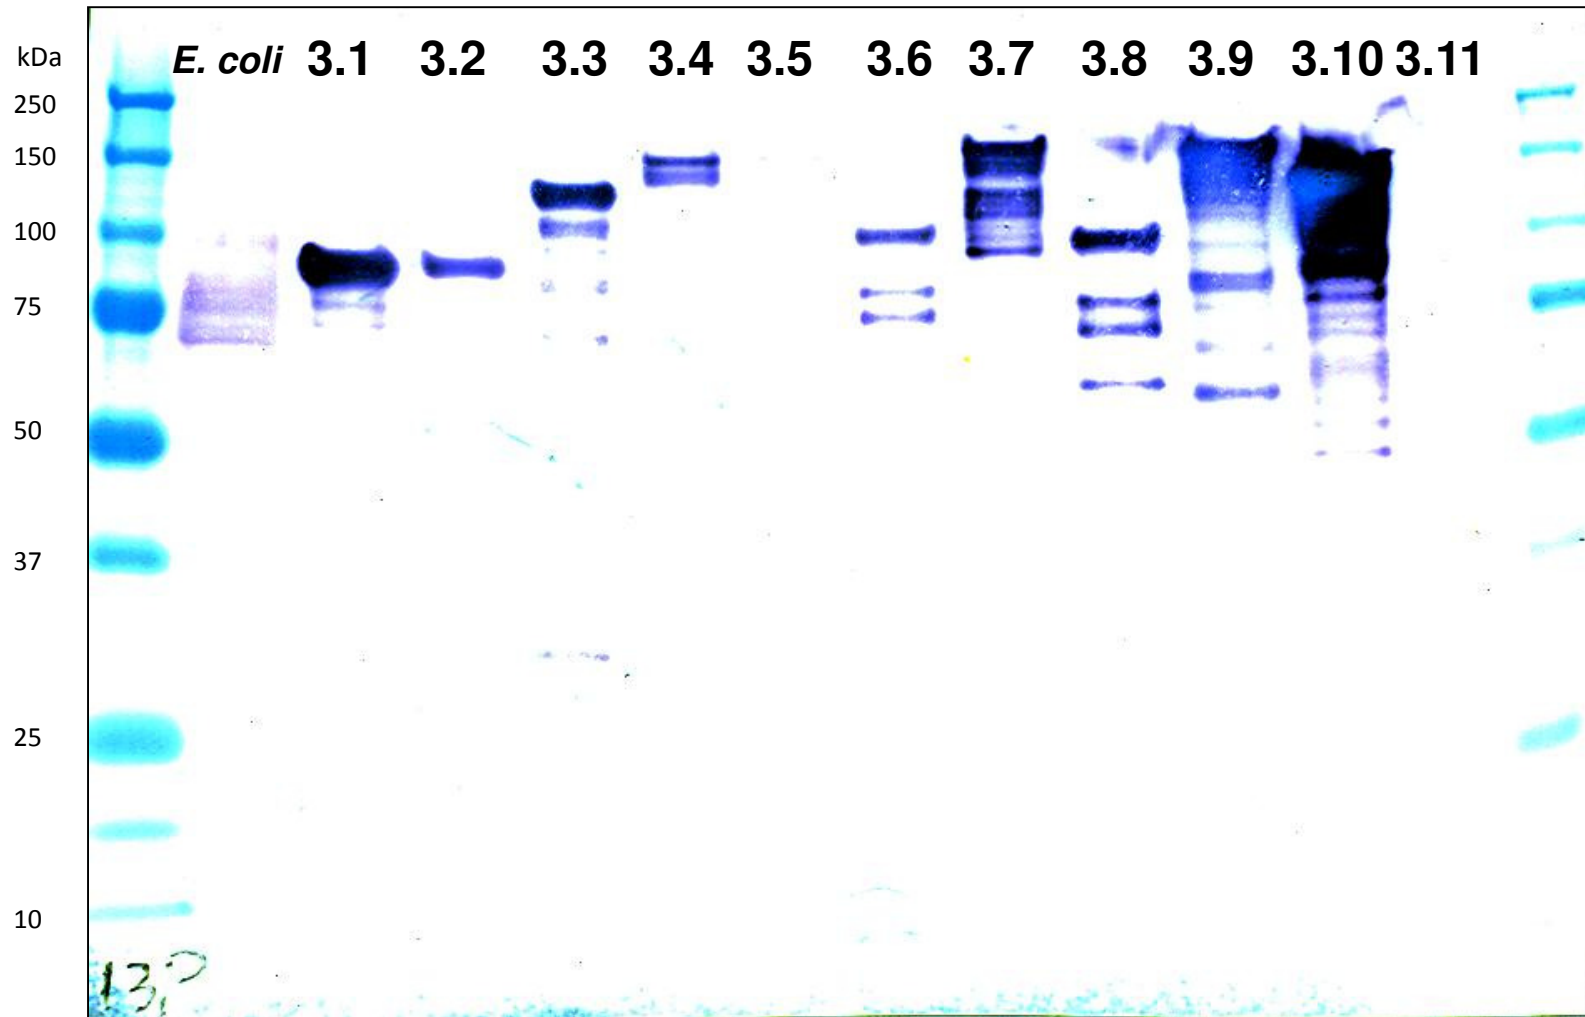

# Figure S6

Immunoblot using  $\alpha$ -rPvMSP3.10 Ab **after** affinity purification with rPvMSP3.1, rPvMSP3.8 and rPvMSP3.9 columns

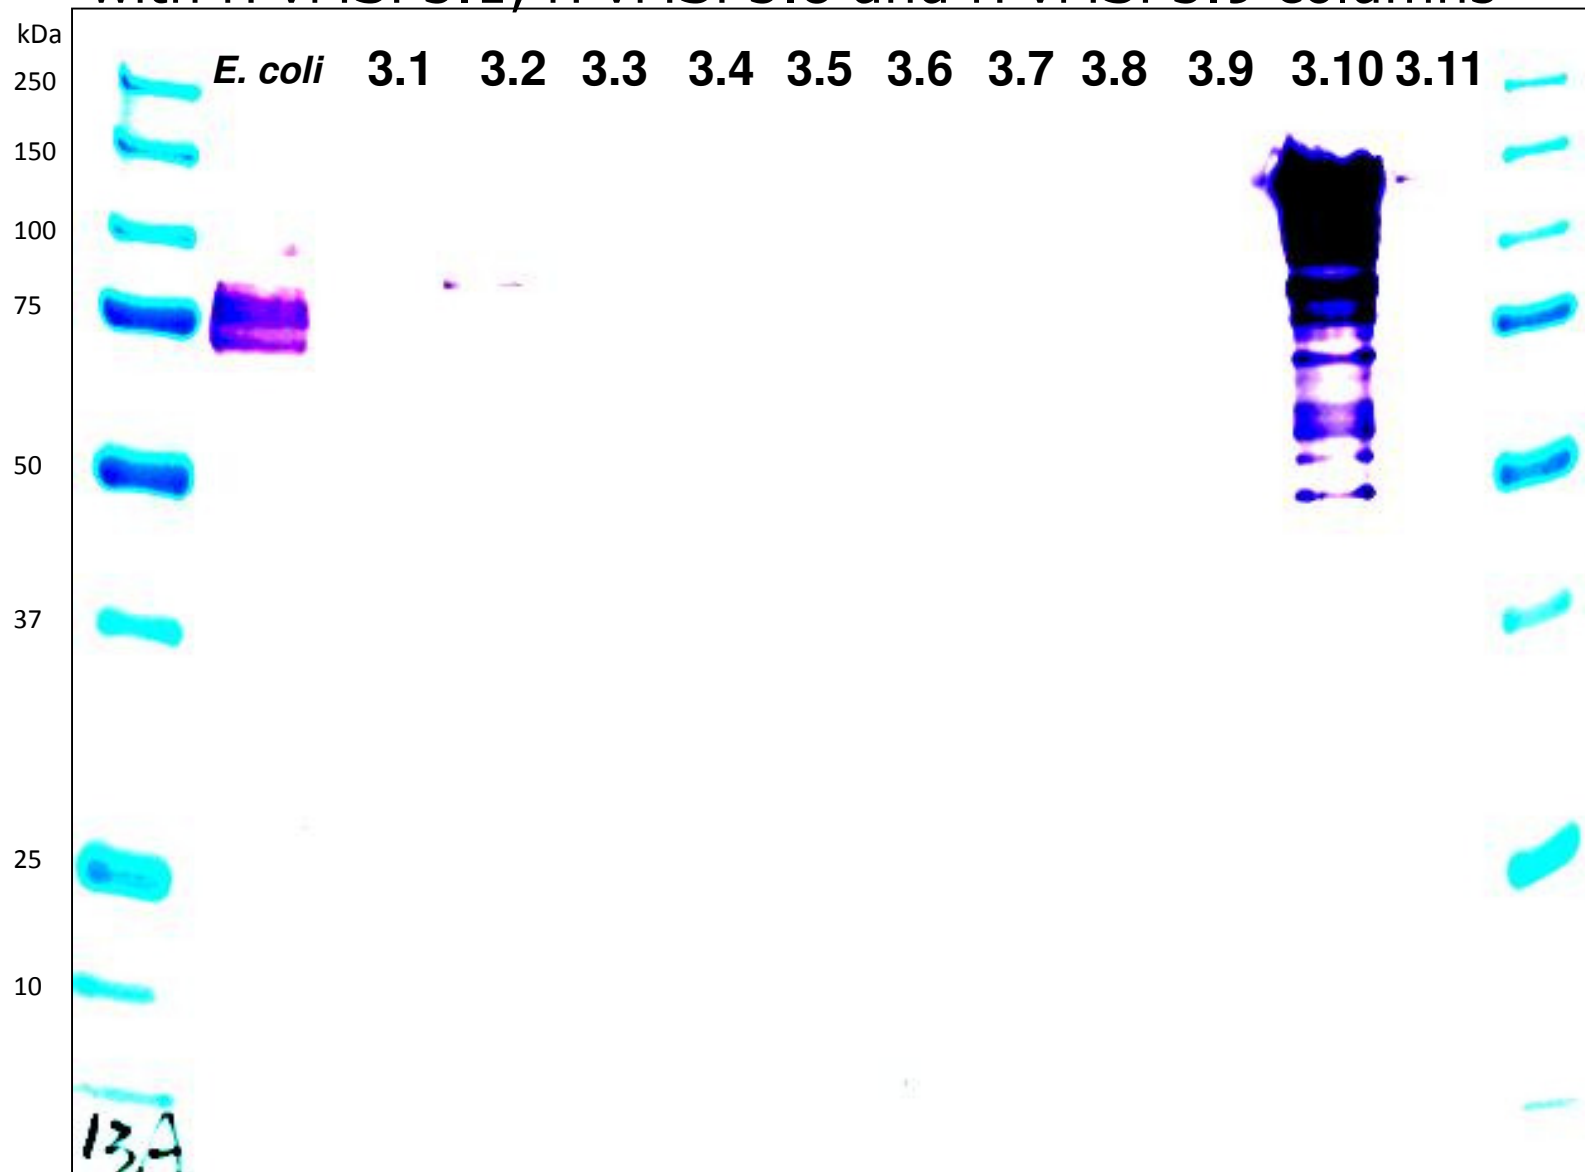



# Figure S6

Immunoblot using  $\alpha$ -rPvMSP3.10 Ab **after** secondary affinity purification with rPvMSP3.2, rPvMSP3.3 and rPvMSP3.4 antigen columns

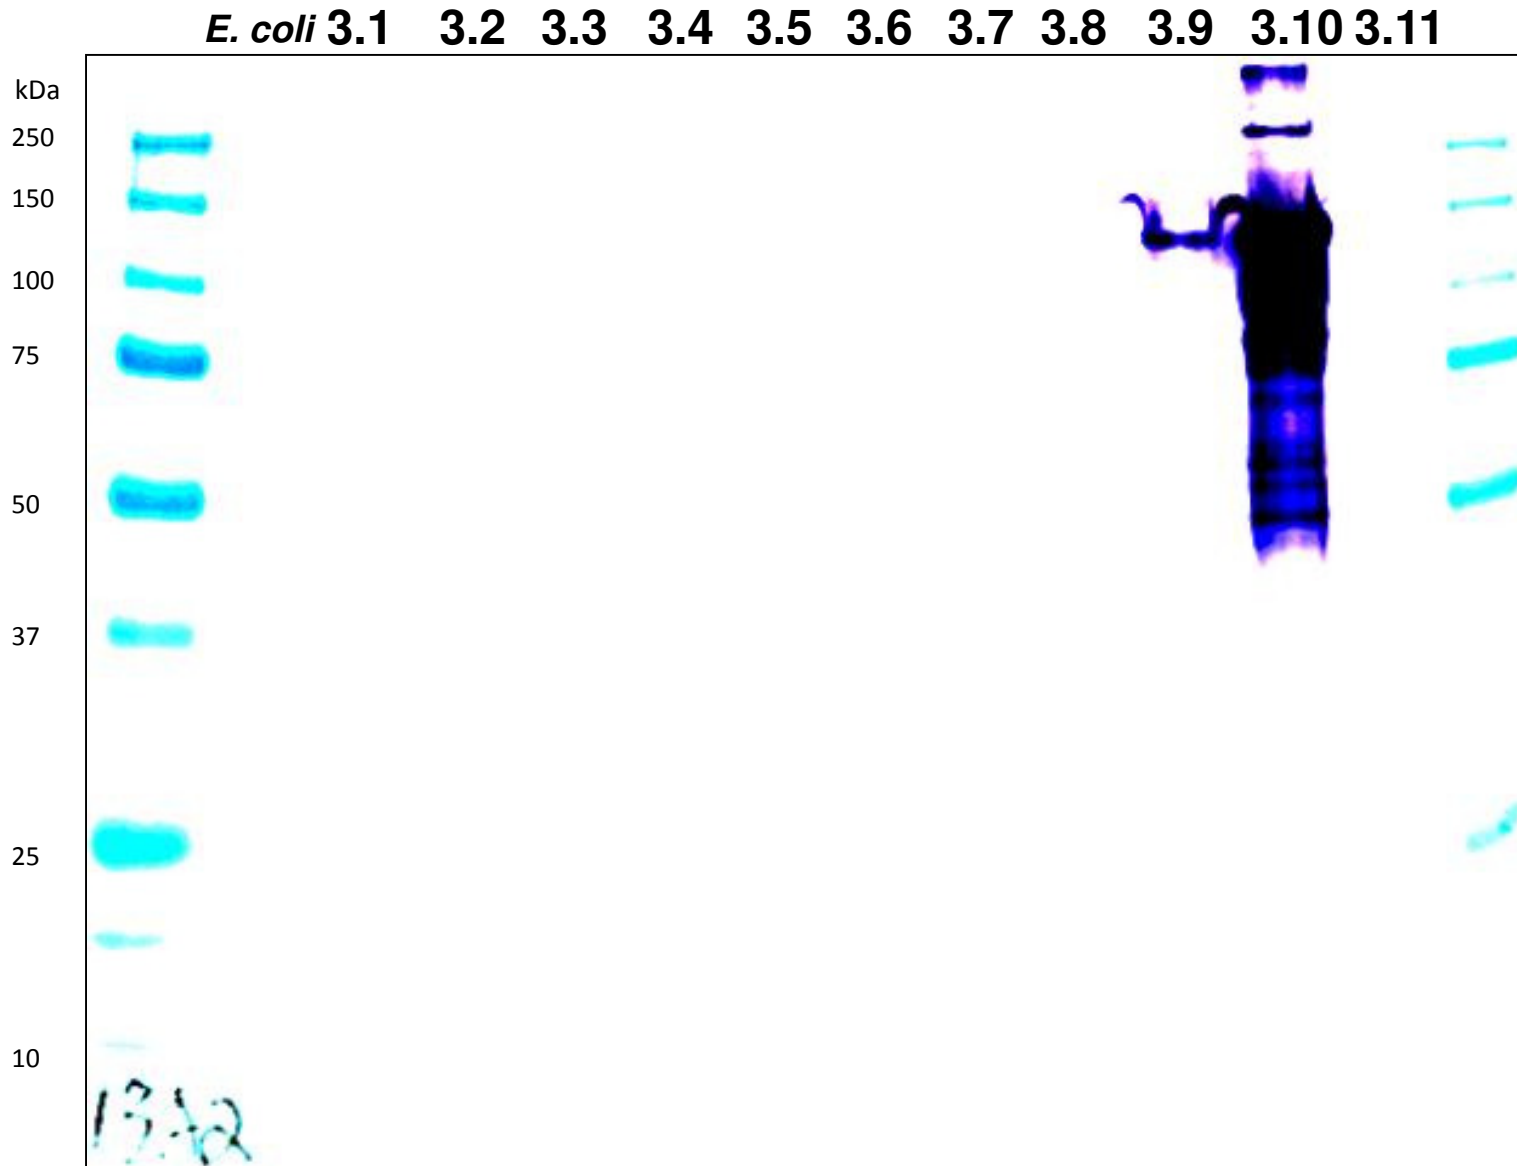

# Figure S6

Immunoblot using  $\alpha$ -rPvMSP3.11 Ab **before** affinity purification with rPvMSP3.2, rPvMSP3.3 and rPvMSP3.6 columns

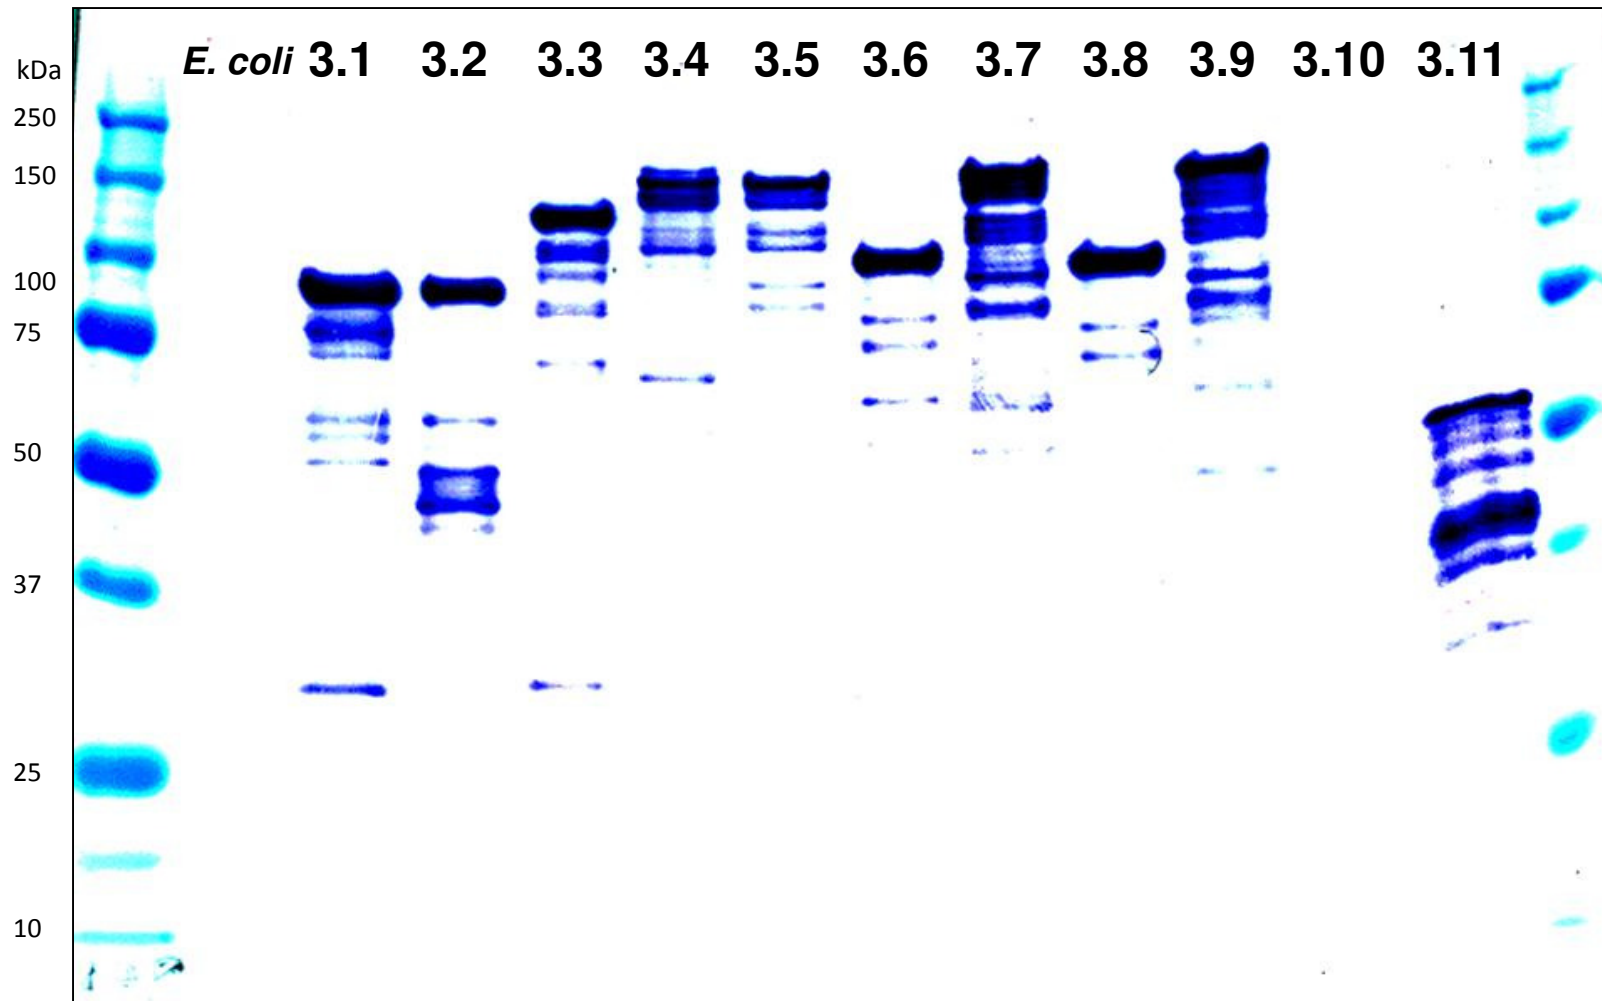

# Figure S6

Immunoblot using  $\alpha$ -rPvMSP3.11 Ab **after** affinity purification with rPvMSP3.2, rPvMSP3.3 and rPvMSP3.8 columns

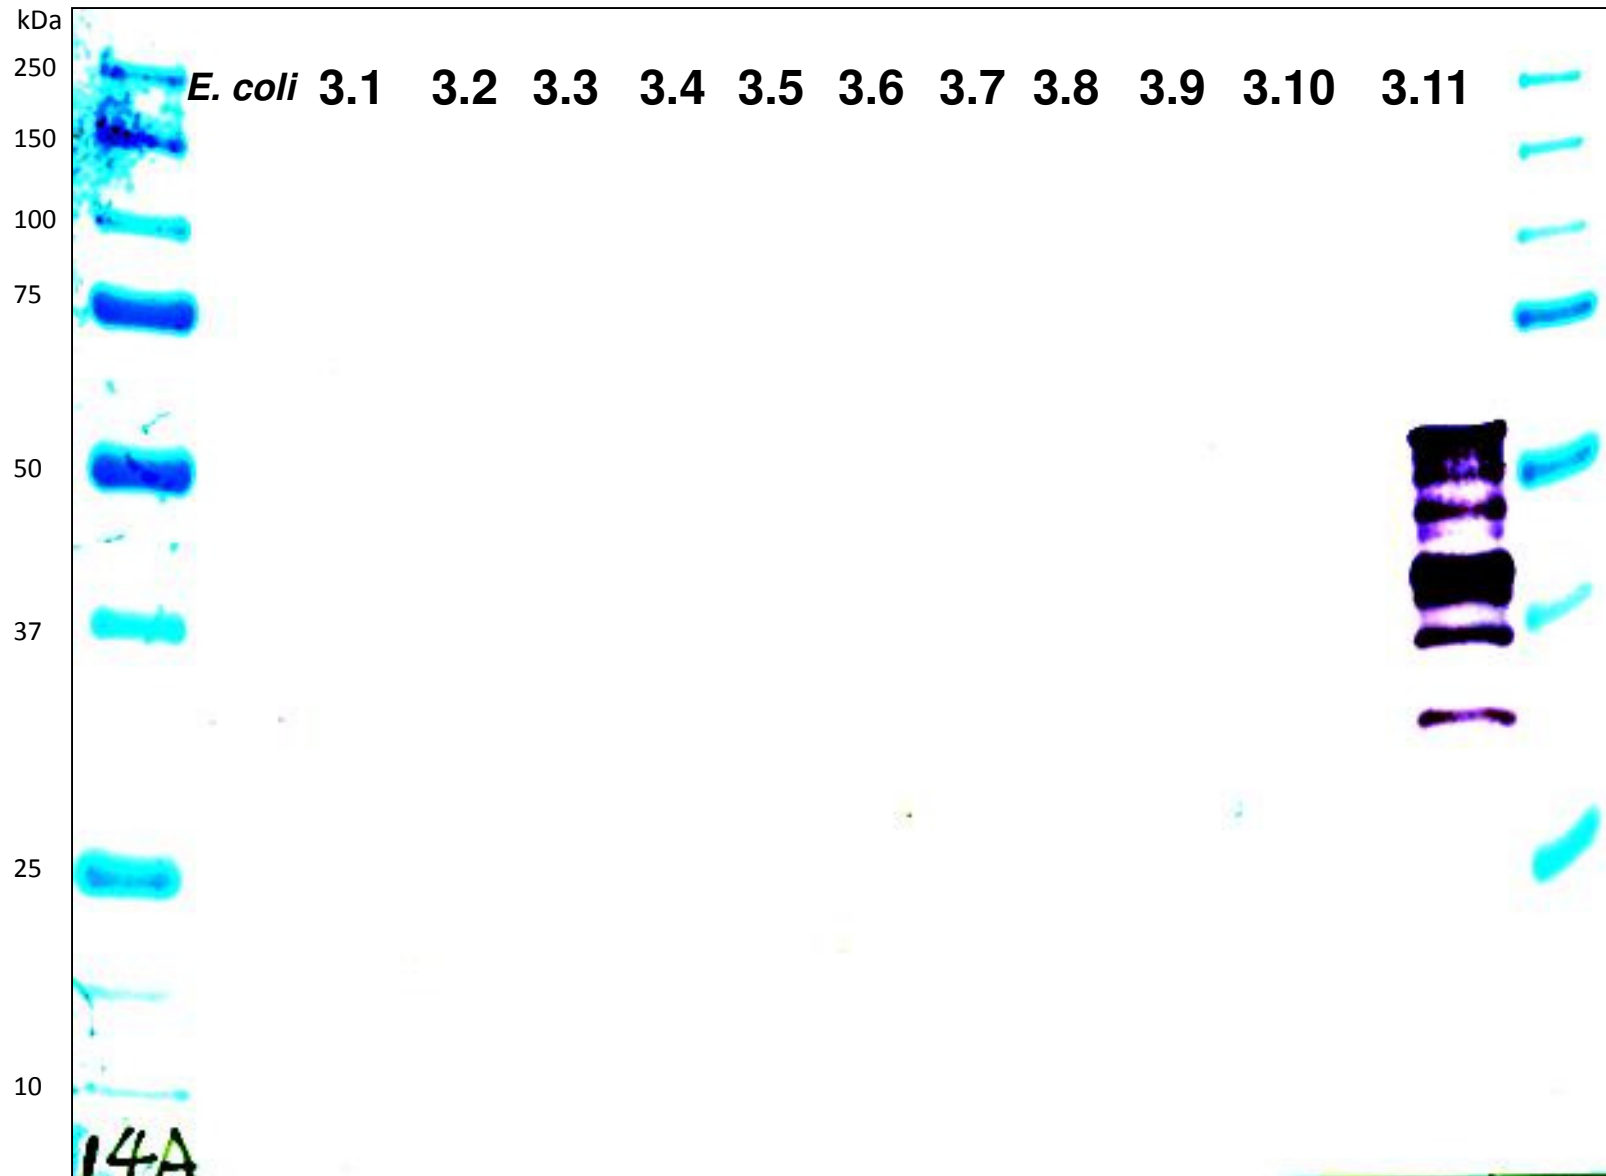

Supplement: pone.0063888.s006.pdf [file pone.0063888.s006.pdf]
