# Supplementary material for: Plasmodium vivax Merozoite Surface Protein-3 (PvMSP3): Expression of an 11 Member Multigene Family in Blood-Stage Parasites
Source: PubMed Central journal article supplement (PMC3662707; doi:10.1371/journal.pone.0063888), 2013-05-23
Supplement: pone.0063888.s002.pdf [file pone.0063888.s002.pdf]

**Figure S2.** The typical tandemly-repeated heptad motif AXXAXXX, predicted to form  $\alpha$ -helical coiled-coil structures, was found in the putative MSP3 proteins analyzed (see sequence IDs in Table S2) using the MEME algorithm (<http://meme.sdsc.edu/meme4/cgi-bin/meme.cgi>). Numbers in parentheses refers to amino acid position.

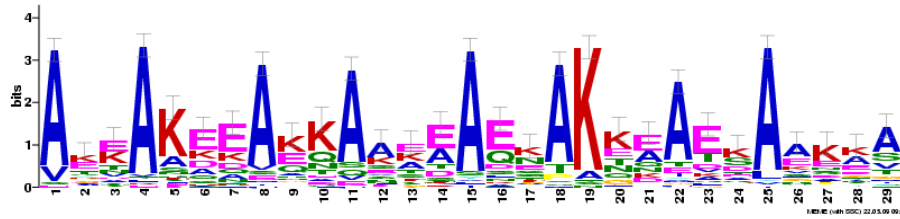

|                             | <u>AXXAXXXAXXAXXXAXXAXXXAXXAXXX</u> |
|-----------------------------|-------------------------------------|
| PfMSP3.1-FC27 (94)          | AKQASQDAEQAAKDAENASKEAEEAAKEA       |
| PfMSP3.1-FC27 (138)         | ACTAASKAKKAVETALKAKDDAETALKTS       |
| PfMSP3.1-CSL2 (94)          | AKQASQDAEQAAKDAEQAAKDAEQASKDA       |
| PfMSP3.1-CSL2 (138)         | ACTAASKAKKAFETASNAKKAESALKTN        |
| PfMSP3.1-CSL2 (178)         | SRKTKEYAEQVEKDYERAKNAYQKANQAV       |
| PkMSP3 <sub>140</sub> (202) | AENAVQEIQKAKKEADIAKNAATKLMEEES      |
| PkMSP3 <sub>140</sub> (501) | VPEVTEAVKSAKEEAENAKKEEQAEEMES       |
| PkMSP3 <sub>172</sub> (241) | AEKAKEEAENAVKEIQKAKEEADIAKAA        |
| PcyMSP3.10 (243)            | ATEAKKQAEKAKEAEEAKTQEKKAEKAG        |
| PcyMSP3.10 (435)            | AETARNEAKNAENAAEEAKQAACKANDAT       |
| PcyMSP3.10 (110)            | AKTEKENLPDSANDAETAANNVVDARNGL       |
| PvMSP3.1 (220)              | AYELKKEAEKAQEEAEAakteIEKLSKVY       |
| PvMSP3.1 (453)              | AKNAKDKATKAAKEAEEAKKQAEKAEKIT       |
| PvMSP3.1 (593)              | AIAADVLAQKASTEAAQSLKQEAELAENI       |
| PvMSP3.2 (227)              | AEEAKKEAEKAQTEVEAAKKEAEKVMAEA       |
| PvMSP3.2 (688)              | EKVAKAEVDKATSEAEKAKTAAGEAKNAS       |
| PvMSP3.3 (101)              | AQNAAKAEAEKAAKAAESAKENTLDALEKV      |
| PvMSP3.3 (373)              | VEKAKEAEKQAKSEAEKAKGMADDAGGKG       |
| PvMSP3.4 (231)              | AYEAKKKARESKVAENAKNDATSAASGS        |
| PvMSP3.4 (388)              | VKSAKSEAVNQAAAADKAKKEAEEAANSA       |
| PvMSP3.4 (510)              | AQEAAQKAKEQEAELKAKGNAQTASDQA        |
| PvMSP3.4 (821)              | AGVAKEDAKKAAASAEQPKKEAESAEEGA       |
| PvMSP3.5 (223)              | AYEAKRNANDSKEAAEKTKKDATSAVSDS       |
| PvMSP3.5 (508)              | AQEAAKRAQEQDVAASTAKGNAETAKEEA       |
| PvMSP3.5 (619)              | ADKASAAKTADKAAASAKKEADDATTES        |
| PvMSP3.5 (821)              | AGVAKEDAKKAAASAEQPKKEEESAEEEDA      |
| PvMSP3.6 (170)              | AKEKKETANTALGEAQKAKKEMETAHAVIV      |
| PvMSP3.6 (204)              | AMEAEKESQKANEEAQKANQEAENAKNNI       |
| PvMSP3.6 (260)              | AKGAIENAKQASTRATGAAQKATGAAQKA       |
| PvMSP3.6 (358)              | ANKAKKEAAAAAKTSSKSAKLTAGRAVKKA      |
| PvMSP3.6 (494)              | AEKANAKAKQAASEAQEAKTQTEKAAKAA       |
| PvMSP3.6 (689)              | ATKAADEAGKAATAADNTKKAATSAEAKV       |
| PvMSP3.7 (173)              | ATSAKEQAQKASGEAETAKEKAAAATKAA       |
| PvMSP3.7 (837)              | AEAAKDEAKKAAASAEQPKKEAESAVEDA       |
| PvMSP3.8 (215)              | AQKAKEEAQKANEEAQNANKNFVMIKPKQ       |
| PvMSP3.8 (362)              | AKKAKDEAAAAAKTSSKSAKLAATRAAKKA      |
| PvMSP3.8 (501)              | AEKANAKAKQAASEAQEAKTQTEKAAKAA       |
| PvMSP3.8 (696)              | ATKAADEAGKAATAADNTKKAATSAEAKV       |
| PvMSP3.8 (98)               | AKKAKADAEQAEAEAQKAKQKILDAEKET       |

|                 |                               |
|-----------------|-------------------------------|
| PvMSP3.9 (113)  | AENAAEEAQKFATQAQGAEEQAAQAAQAA |
| PvMSP3.9 (162)  | ATDAKEEAENESREANNAKEEADAAARKA |
| PvMSP3.9 (306)  | ATDAKEEAENESREANNAKEEADAAARKA |
| PvMSP3.9 (590)  | AENAKKEAQQAQQAALQAKTDAKKYADQS |
| PvMSP3.9 (948)  | AEAAKDEAKKAVESAESKGEAESAVEDA  |
| PvMSP3.10 (114) | VKTAKDESATAAKDAETAKKNAVDAGKGL |
| PvMSP3.10 (350) | VPEAQREAKLATQTASKATEATEAGKKA  |
| PvMSP3.10 (446) | ATEAKEQAEKAKAAEEAKTHGEKAEKVG  |
| PvMSP3.10 (502) | AVDALEEAYAVEAHLARTKNAESAASAT  |
| PvMSP3.11 (143) | VRTAKEQETKALEAAQVVKGLAEKAEPTT |
| PvMSP3.11 (78)  | ADEAKEAFKKAQSLAEEAKEKAAEAAKAV |
