# Supplementary material for: Plasmodium vivax Merozoite Surface Protein-3 (PvMSP3): Expression of an 11 Member Multigene Family in Blood-Stage Parasites
Source: PubMed Central journal article supplement (PMC3662707; doi:10.1371/journal.pone.0063888), 2013-05-23
Supplement: pone.0063888.s003.pdf [file pone.0063888.s003.pdf]

**Figure S3.** Glutamate-rich motifs from the C-termini of MSP3 proteins. The high content of glutamic acid (E) residues are present amidst other acidic amino acids in clusters, resulting in hydrophilic C-terminal regions.

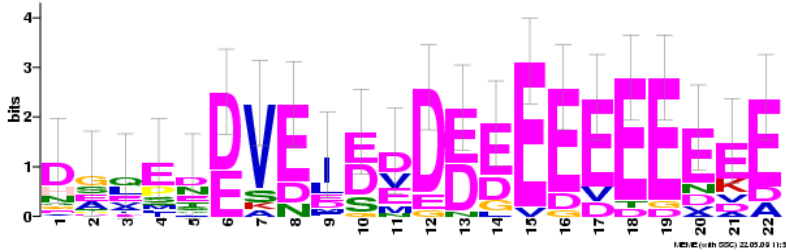

|                             |                                                             |   |
|-----------------------------|-------------------------------------------------------------|---|
| PfMSP3.1-FC27 (278)         | NEEETESEI <del>SE</del> EEEEEEEEEEKE                        | 1 |
| PfMSP3.1-CSL2 (277)         | NEEETESEI <del>SE</del> EEEEEEEEEEKE                        | 1 |
| PkMSP3 <sub>140</sub> (773) | AGDMEDKEL <del>EEEEEEEEEEEE</del> EDD                       | 1 |
| PkMSP3 <sub>172</sub> (816) | DDVEDDVEDDND <del>DE</del> EEEEEEEE                         | 1 |
| PcyMSP3.10 (548)            | DGQEEDVNMEDDGE <del>EV</del> DDEEE                          | 1 |
| PvMSP3.1 (741)              | DAEPQEAEEGDEE <del>DEED</del> TEEEE                         | 1 |
| PvMSP3.2 (793)              | DAAPSDVEE <del>DEGE</del> LEEEEEEE                          | 1 |
| PvMSP3.3 (916)              | QTQID <del>VD</del> ISVDNE <del>EEEE</del> GAAE             | 1 |
| PvMSP3.4 (996)              | DSASSDVEI <del>ED</del> EEEEEEEEDEE                         | 1 |
| PvMSP3.5 (999)              | HPILNDVEI <del>DD</del> EEEEEEEEEE                          | 1 |
| PvMSP3.6 (801)              | DGLEDDV <del>LDV</del> DDV <del>EEEE</del> NVA              | 1 |
| PvMSP3.7 (1015)             | HSLPNDVEI <del>ED</del> DDDE <del>EEEE</del> KE             | 1 |
| PvMSP3.8 (809)              | DGLEDDV <del>DFD</del> VDDG <del>EEEE</del> NVA             | 1 |
| PvMSP3.9 (1124)             | HSVSNEVEI <del>ED</del> EEEEEEEEEE                          | 1 |
| PvMSP3.10 (751)             | GAQEEDVNLE <del>MD</del> EEEE <del>V</del> EEVEE            | 1 |
| PvMSP3.11 (312)             | EEQTL <del>E</del> V <del>ED</del> DDV <del>EEEE</del> EDDD | 1 |
