# Supplementary material for: Plasmodium vivax Merozoite Surface Protein-3 (PvMSP3): Expression of an 11 Member Multigene Family in Blood-Stage Parasites
Source: PubMed Central journal article supplement (PMC3662707; doi:10.1371/journal.pone.0063888), 2013-05-23
Supplement: pone.0063888.s005.pdf [file pone.0063888.s005.pdf]

# Figure S5

Cross reactivity is not caused by vector residues or 6xHis tag  
( $\alpha$ -rPvMSP3.2)

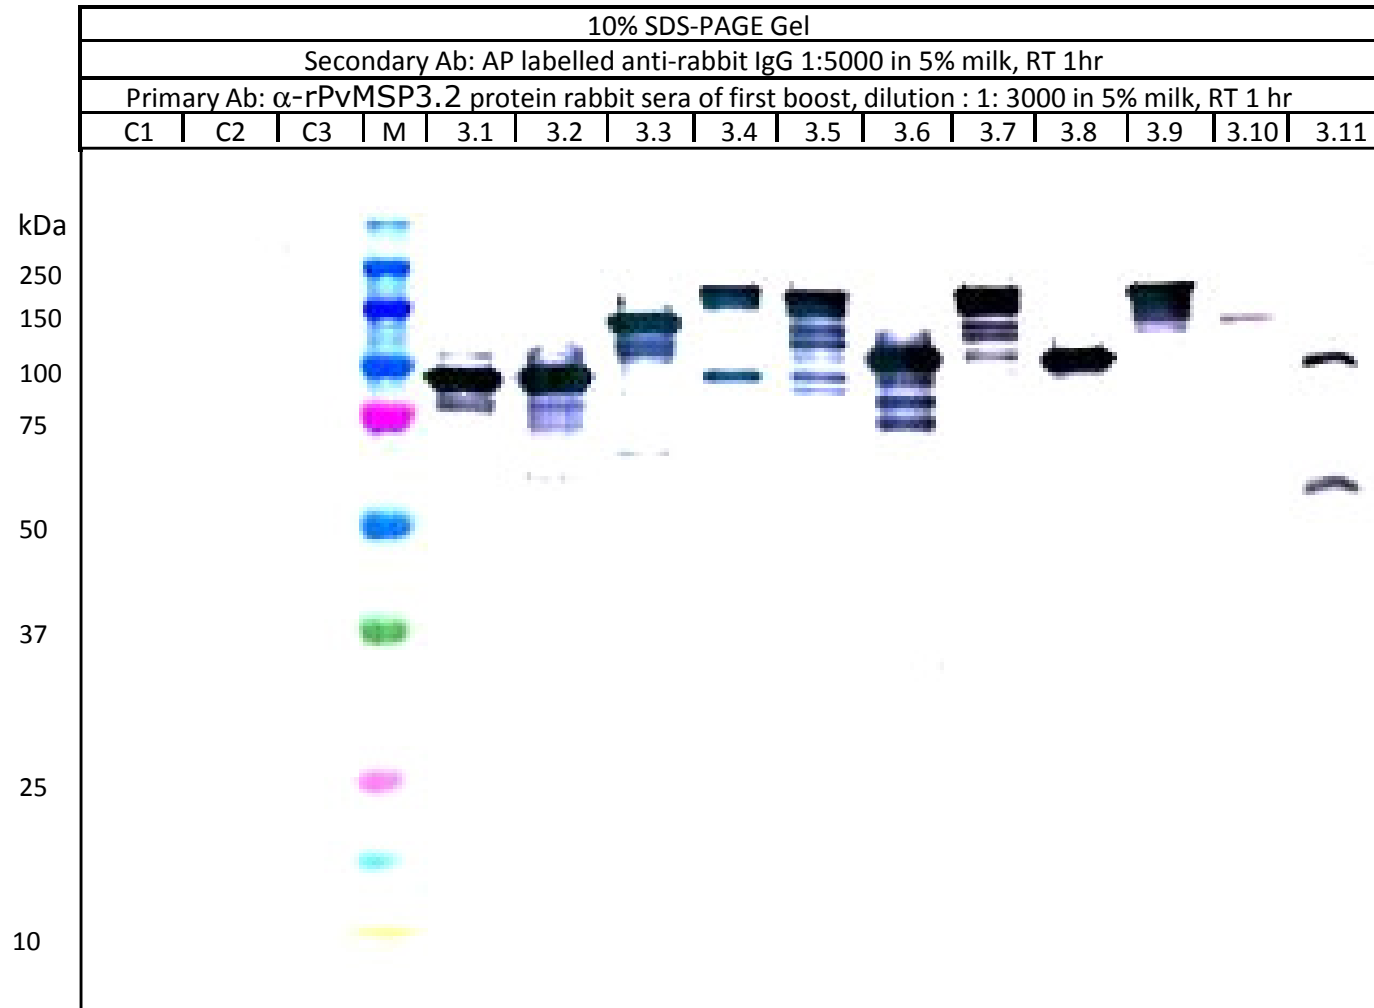

\* C1-C3 = Control proteins in the same expression vector or contains 6x-His tag
