# Supplementary material for: Plasmodium vivax Merozoite Surface Protein-3 (PvMSP3): Expression of an 11 Member Multigene Family in Blood-Stage Parasites
Source: PubMed Central journal article supplement (PMC3662707; doi:10.1371/journal.pone.0063888), 2013-05-23

# Figure S7

Detection of PvMSP3 homologs PcyMSP3 and PkMSP3 with rabbit antiserum against specific rPvMSP3s. Same volume (10ul) of *P. cynomolgi* and *P. knowlesi* parasite extracts representing schizont stage from the Berok and H strain respectively were separated by 7.5% SDS-PAGE, transferred to nitrocellulose membranes and probed with primary antisera at 1:5,000 dilution. All membranes were exposed for the same length of time for chemiluminescence detection.

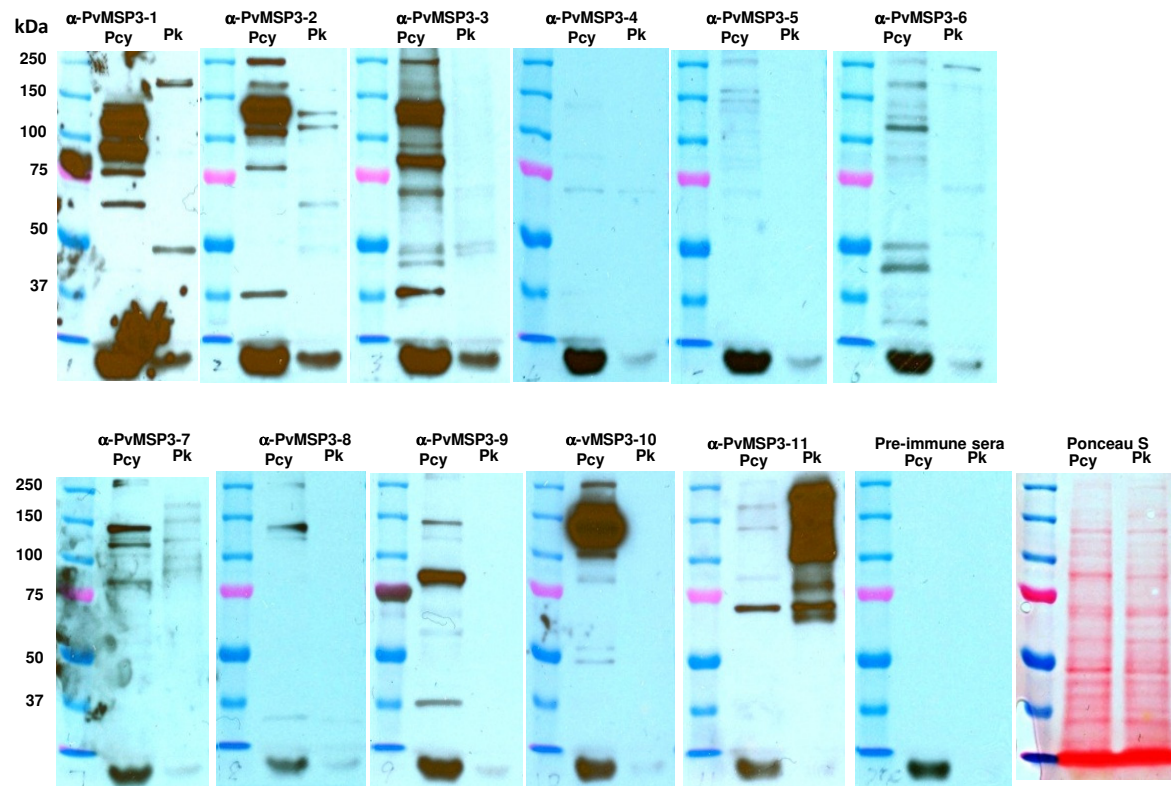

Supplement: pone.0063888.s007.pdf [file pone.0063888.s007.pdf]
