# Supplementary material for: Plasmodium vivax Merozoite Surface Protein-3 (PvMSP3): Expression of an 11 Member Multigene Family in Blood-Stage Parasites
Source: PubMed Central journal article supplement (PMC3662707; doi:10.1371/journal.pone.0063888), 2013-05-23
Supplement: pone.0063888.s008.pdf [file pone.0063888.s008.pdf]

**Table S1.** Primers used for gene-specific PCR, quantitative real-time RT-PCR, and recombinant protein expression

| Gene                | Primer       | Sequence (5' → 3')                | Sequence (5' → 3')       | Sequence (5' → 3')               |
|---------------------|--------------|-----------------------------------|--------------------------|----------------------------------|
|                     |              | Real-time PCR                     | Gene specific PCR        | Protein expression               |
| <i>pvm</i> sp3.1    | Sense        | AGACCAAAACGAATTGCTACACAA          | CACAAATAGTATGGCATATCTC   | CACCATGGCACAAATTA AAAAGCTAACGAAG |
|                     | Antisense    | CTGATCCCCCTATTCTTGACT             | TTCCGTGCTFACTTTCTCTA     | CTACTCGAGTTC AATAATTCAAAGGCTG    |
|                     | Taqman probe | TCGGAAGAAACAGATTTTCAAACGCAAGGA    |                          |                                  |
| <i>pvm</i> sp3.2    | Sense        | AGGCAAGTGATAACGTATTGATAAA         | AAAATCAGAAGCACAGGTGC     | CACCATGGTTGAAAAGCTAACGAAGCA      |
|                     | Antisense    | TCCTTGACAGCATCGTTTCT              | CTTGCCATACTAGCTGATGC     | CTACTCGAGTTCGCTTCACTGTGTGCTT     |
|                     | Taqman probe | AGGTGGCACAGGAAGTCGAAGATCGG        |                          |                                  |
| <i>pvm</i> sp3.3    | Sense        | AGTTCAAAGATTCAAATACTGCGAAA        | AGCAACTTTGTGGCTTAGCC     | CACCATGGCAGCTGAACAAAAGTGCATGC    |
|                     | Antisense    | TGCTTCCCAACATCGCTAA               | CGGAGATCCCTTTTGTCTT      | CTACTCGAGCTTTTTTGTCTAATCAATG     |
|                     | Taqman probe | CGGGAGGAGTGGAAATTTTGGAACTCTG      |                          |                                  |
| <i>pvm</i> sp3.4    | Sense        | AGGCTACAATGTGGTCGATAATGA          | TATTCACAAAATGTTGTGAGC    | CACCATGGCAAGTAAAGAAGACATAAAAAC   |
|                     | Antisense    | TCGCTC GATGCTGAATCGT              | TCAAATCTGCTCATCTGTC      | CTACTCGAGTTCATCACTCTTTTCTTGGG    |
|                     | Taqman probe | CAGGTGCTAAACGAAGTTGACGAACAGGC     |                          |                                  |
| <i>pvm</i> sp3.5    | Sense        | GCAGAAGACGGTGATGAGATAGAC          | GAAGCAATTTTGGCGTATCC     | CACCATGGCAGAAGACTTAAAAGACAAATAGG |
|                     | Antisense    | TCTTCATTATCATCATTACCTTGTCTCT      | TGCTAATGTGCTTGATCAA      | CTACTCGAGTCTA AACTCGGTTATGCTGC   |
|                     | Taqman probe | ACGGAAGCCATATCGAATTGCCACAAA       |                          |                                  |
| <i>pvm</i> sp3.6    | Sense        | ACGCAGACAAGCAGTTTGGGA             | GGGACAAGATAAAGAAAAGGTGGC | CACCATGGCACAAAATTCGGATGAAAC      |
|                     | Antisense    | AACTAAGGACGTCATCGTTTTTACG         | CCCAATGCTGTATTGCTGT      | CTACTCGAGAGCTGATGTTGCTGCCTTTT    |
|                     | Taqman probe | CGACGCGTACAACGACATTAAGAAGGTAACAGA |                          |                                  |
| <i>pvm</i> sp3.7    | Sense        | AATTA AAAATAGCCGAACAGGAATTG       | ACAACAAGAAGAAGCAGTCGATT  | CACCATGGCAGCACACAAGAAGAAGCAGT    |
|                     | Antisense    | CCGCAAGGGCTTTCGTT                 | CATTGCCTGTGCTTATTG       | CTACTCGAGTTC ACTCTTTTCTTGGGATT   |
|                     | Taqman probe | AGCTAAGGGAGCCACGTCGATGGAA         |                          |                                  |
| <i>pvm</i> sp3.8    | Sense        | ACCAAAGCGAATTGCTACACAA            | ACGCAGGGGCAAAAATACGAAGT  | CACCATGGCACAGGGGCAAAAATACGAAGT   |
|                     | Antisense    | TGATTCTCCACCCTTCGTT               | GCACCTGCTTGTGGGCTT       | CTACTCGAGAGCTGATGTTGCTGCCTTTT    |
|                     | Taqman probe | CGGATGAAGGCTCACTCCAGACGC          |                          |                                  |
| <i>pvm</i> sp3.9    | Sense        | GATAACTCTCCCATAGTGACACTGA         | CACGTTGCTACAGCAGAAAAG    | CACCATGGCATCAGAAGTAAAAGAGGCAGAAA |
|                     | Antisense    | AGGAGCGCTTGGGTGTTG                | CTTGTCGACGTGCATCCATT     | CTACTCGAGAAGTTTTTCTTTAAGGCTG     |
|                     | Taqman probe | AAATCAAAGTGTGAAACCCCGGAACA        |                          |                                  |
| <i>pvm</i> sp3.10   | Sense        | TGGCGCCGAGTTATAGG                 | ATGAAACACACCCGACGCT      | CTAGCCATGGATCAAGTGACCGAGAAG      |
|                     | Antisense    | TCCTTAAATGGTGTCTGCTGGAA           | AGGCTTTGTGCGATCCTGTG     | ATGCTCGAGTAGGTGATTCATATCGGA      |
|                     | Taqman probe | CCCCAACAATGAAGCCCGA               |                          |                                  |
| <i>pvm</i> sp3.11   | Sense        | AAGGAAGCAACGCGAAAGC               | ATGAGGCAATTCGTGAGAAT     | CACCATGGCACTAAACGTTAACAACGAA     |
|                     | Antisense    | GGATGTGCTGGTTCGTTGTCT             | ACTCTTTGATGCTGTCCCC      | CTACTCGAGATCATCTCGTCTTCGTCAT     |
|                     | Taqman probe | AGGCCGAAGCGCACGAATTTTGG           |                          |                                  |
| <i>pvSeryl-tRNA</i> | Sense        | CATCCATATAGAATCGTCAGCAT           |                          |                                  |
|                     | Antisense    | GGAAAGTAGCCCTCCAATCAAA            |                          |                                  |
|                     | Taqman probe | CCCTCAACAACCGCTGCTGT              |                          |                                  |
