# Supplementary material for: Plasmodium vivax Merozoite Surface Protein-3 (PvMSP3): Expression of an 11 Member Multigene Family in Blood-Stage Parasites
Source: PubMed Central journal article supplement (PMC3662707; doi:10.1371/journal.pone.0063888), 2013-05-23
Supplement: pone.0063888.s009.pdf [file pone.0063888.s009.pdf]

**Table S2.** Gene accession numbers or identification numbers used for analysis

| Gene                        | Accession number/Gene ID | Strain | Source                                                                            |
|-----------------------------|--------------------------|--------|-----------------------------------------------------------------------------------|
| <i>pvmsp3.1</i>             | PVX_097670               | Sal 1  | PlasmoDB - <i>Plasmodium</i> Genomics Resource                                    |
| <i>pvmsp3.2</i>             | PVX_097675               | Sal 1  | PlasmoDB - <i>Plasmodium</i> Genomics Resource                                    |
| <i>pvmsp3.3</i>             | PVX_097680               | Sal 1  | PlasmoDB - <i>Plasmodium</i> Genomics Resource                                    |
| <i>pvmsp3.4</i>             | PVX_097685               | Sal 1  | PlasmoDB - <i>Plasmodium</i> Genomics Resource                                    |
| <i>pvmsp3.5</i>             | PVX_097690               | Sal 1  | PlasmoDB - <i>Plasmodium</i> Genomics Resource                                    |
| <i>pvmsp3.6</i>             | PVX_097695               | Sal 1  | PlasmoDB - <i>Plasmodium</i> Genomics Resource                                    |
| <i>pvmsp3.7</i>             | PVX_097700               | Sal 1  | PlasmoDB - <i>Plasmodium</i> Genomics Resource                                    |
| <i>pvmsp3.8</i>             | PVX_097705               | Sal 1  | PlasmoDB - <i>Plasmodium</i> Genomics Resource                                    |
| <i>pvmsp3.9</i>             | PVX_097710               | Sal 1  | PlasmoDB - <i>Plasmodium</i> Genomics Resource                                    |
| <i>pvmsp3.10</i>            | PVX_097720               | Sal 1  | PlasmoDB - <i>Plasmodium</i> Genomics Resource                                    |
| <i>pvmsp3.11</i>            | PVX_097725               | Sal 1  | PlasmoDB - <i>Plasmodium</i> Genomics Resource                                    |
| <i>pvSeryl-tRNA</i>         | PVX_000545               | Sal 1  | PlasmoDB - <i>Plasmodium</i> Genomics Resource                                    |
| <i>pcymsp3.10</i>           | KC109789                 | Berok  | Galinski <i>et al</i> , unpublished                                               |
| <i>pkmsp3<sub>140</sub></i> | PKH_145630               | H      | PlasmoDB - <i>Plasmodium</i> Genomics Resource, {David, 1985 #160}                |
| <i>pkmsp3<sub>172</sub></i> | PKH_103020               | H      | PlasmoDB - <i>Plasmodium</i> Genomics Resource, Barnwell <i>et al</i> unpublished |
| <i>pfmsp3.1</i>             | L07944.1                 | FC27   | NCBI                                                                              |
| <i>pfmsp3.1</i>             | U08852.1                 | CSL2   | NCBI                                                                              |
