# Supplementary material for: Plasmodium vivax Merozoite Surface Protein-3 (PvMSP3): Expression of an 11 Member Multigene Family in Blood-Stage Parasites
Source: PubMed Central journal article supplement (PMC3662707; doi:10.1371/journal.pone.0063888), 2013-05-23
Supplement: pone.0063888.s010.pdf [file pone.0063888.s010.pdf]

**Table S3.** Raw data of qRT-PCR detection of transcript level of PvMSP3 family members with TaqMan probes

| Well | Ct   | Identifier                                    | $2^{-\Delta\Delta Ct}$ | Well | Ct   | Identifier                                    | $2^{-\Delta\Delta Ct}$ | Average $2^{-\Delta\Delta Ct}$ | STDEV |
|------|------|-----------------------------------------------|------------------------|------|------|-----------------------------------------------|------------------------|--------------------------------|-------|
| B1   | 26.8 | Pvseryl-tRNA synthetase Primers / gDNA        |                        | C1   | 26.9 | Pvseryl-tRNA synthetase Primers / gDNA        |                        |                                |       |
| B2   | 27.9 | PvMSP3.1 Primers / gDNA                       |                        | C2   | 27.9 | PvMSP3.1 Primers / gDNA                       |                        |                                |       |
| B3   | 25.6 | PvMSP3.2 Primers / gDNA                       |                        | C3   | 25.4 | PvMSP3.2 Primers / gDNA                       |                        |                                |       |
| B4   | 26.4 | PvMSP3.3 Primers / gDNA                       |                        | C4   | 26.6 | PvMSP3.3 Primers / gDNA                       |                        |                                |       |
| B5   | 26.8 | PvMSP3.4 Primers / gDNA                       |                        | C5   | 26.8 | PvMSP3.4 Primers / gDNA                       |                        |                                |       |
| B6   | 27.8 | PvMSP3.5 Primers / gDNA                       |                        | C6   | 28   | PvMSP3.5 Primers / gDNA                       |                        |                                |       |
| B7   | 24.9 | PvMSP3.6 Primers / gDNA                       |                        | C7   | 24.4 | PvMSP3.6 Primers / gDNA                       |                        |                                |       |
| B8   | 26.3 | PvMSP3.7 Primers / gDNA                       |                        | C8   | 26.3 | PvMSP3.7 Primers / gDNA                       |                        |                                |       |
| B9   | 24.8 | PvMSP3.8 Primers / gDNA                       |                        | C9   | 25.1 | PvMSP3.8 Primers / gDNA                       |                        |                                |       |
| B10  | 27.9 | PvMSP3.9 Primers / gDNA                       |                        | C10  | 28.3 | PvMSP3.9 Primers / gDNA                       |                        |                                |       |
| B11  | 25.7 | PvMSP3.10 Primers / gDNA                      |                        | C11  | 25.8 | PvMSP3.10 Primers / gDNA                      |                        |                                |       |
| B12  | 25.8 | PvMSP3.11 Primers / gDNA                      |                        | C12  | 26.3 | PvMSP3.11 Primers / gDNA                      |                        |                                |       |
| D1   | 32   | Pvseryl-tRNA synthetase Primers / Trophs cDNA |                        | E1   | 31.6 | Pvseryl-tRNA synthetase Primers / Trophs cDNA |                        |                                |       |
| D2   | 28.2 | PvMSP3.1 Primers / Trophs cDNA                | 29.86                  | E2   | 28.2 | PvMSP3.1 Primers / Trophs cDNA                | 21.11                  | 25.48                          | 6.18  |
| D3   | 30   | PvMSP3.2 Primers / Trophs cDNA                | 1.74                   | E3   | 29.3 | PvMSP3.2 Primers / Trophs cDNA                | 1.74                   | 1.74                           | 0.00  |
| D4   | 30.8 | PvMSP3.3 Primers / Trophs cDNA                | 1.74                   | E4   | 30.4 | PvMSP3.3 Primers / Trophs cDNA                | 1.87                   | 1.80                           | 0.09  |
| D5   | 29.6 | PvMSP3.4 Primers / Trophs cDNA                | 5.28                   | E5   | 29.6 | PvMSP3.4 Primers / Trophs cDNA                | 3.73                   | 4.51                           | 1.09  |
| D6   | 32.5 | PvMSP3.5 Primers / Trophs cDNA                | 1.41                   | E6   | 32.1 | PvMSP3.5 Primers / Trophs cDNA                | 1.52                   | 1.46                           | 0.07  |
| D7   | 29.3 | PvMSP3.6 Primers / Trophs cDNA                | 1.74                   | E7   | 29.4 | PvMSP3.6 Primers / Trophs cDNA                | 0.81                   | 1.28                           | 0.66  |
| D8   | 29.2 | PvMSP3.7 Primers / Trophs cDNA                | 4.92                   | E8   | 29.8 | PvMSP3.7 Primers / Trophs cDNA                | 2.30                   | 3.61                           | 1.86  |
| D9   | 29.4 | PvMSP3.8 Primers / Trophs cDNA                | 1.52                   | E9   | 29.1 | PvMSP3.8 Primers / Trophs cDNA                | 1.62                   | 1.57                           | 0.08  |
| D10  | 29.9 | PvMSP3.9 Primers / Trophs cDNA                | 9.19                   | E10  | 29.6 | PvMSP3.9 Primers / Trophs cDNA                | 10.56                  | 9.87                           | 0.97  |
| D11  | 29.5 | PvMSP3.10 Primers / Trophs cDNA               | 2.64                   | E11  | 29.8 | PvMSP3.10 Primers / Trophs cDNA               | 1.62                   | 2.13                           | 0.72  |
| D12  | 31.6 | PvMSP3.11 Primers / Trophs cDNA               | 0.66                   | E12  | 31.6 | PvMSP3.11 Primers / Trophs cDNA               | 0.66                   | 0.66                           | 0.00  |
| F1   | 33.1 | Pvseryl-tRNA synthetase Primers / SZ cDNA     |                        | G1   | 32.6 | Pvseryl-tRNA synthetase Primers / SZ cDNA     |                        |                                |       |
| F2   | 31.6 | PvMSP3.1 Primers / SZ cDNA                    | 6.06                   | G2   | 31.2 | PvMSP3.1 Primers / SZ cDNA                    | 5.28                   | 5.67                           | 0.55  |
| F3   | 27.9 | PvMSP3.2 Primers / SZ cDNA                    | 16.00                  | G3   | 28.2 | PvMSP3.2 Primers / SZ cDNA                    | 7.46                   | 11.73                          | 6.04  |
| F4   | 31.9 | PvMSP3.3 Primers / SZ cDNA                    | 1.74                   | G4   | 31.9 | PvMSP3.3 Primers / SZ cDNA                    | 1.32                   | 1.53                           | 0.30  |
| F5   | 31.4 | PvMSP3.4 Primers / SZ cDNA                    | 3.25                   | G5   | 31.6 | PvMSP3.4 Primers / SZ cDNA                    | 1.87                   | 2.56                           | 0.98  |
| F6   | 34   | PvMSP3.5 Primers / SZ cDNA                    | 1.07                   | G6   | 33.7 | PvMSP3.5 Primers / SZ cDNA                    | 1.00                   | 1.04                           | 0.05  |
| F7   | 30.1 | PvMSP3.6 Primers / SZ cDNA                    | 2.14                   | G7   | 30.1 | PvMSP3.6 Primers / SZ cDNA                    | 1.00                   | 1.57                           | 0.81  |
| F8   | 29.8 | PvMSP3.7 Primers / SZ cDNA                    | 6.96                   | G8   | 29.6 | PvMSP3.7 Primers / SZ cDNA                    | 5.28                   | 6.12                           | 1.19  |
| F9   | 31   | PvMSP3.8 Primers / SZ cDNA                    | 1.07                   | G9   | 30.9 | PvMSP3.8 Primers / SZ cDNA                    | 0.93                   | 1.00                           | 0.10  |
| F10  | 31.5 | PvMSP3.9 Primers / SZ cDNA                    | 6.50                   | G10  | 31.5 | PvMSP3.9 Primers / SZ cDNA                    | 5.66                   | 6.08                           | 0.59  |
| F11  | 30.2 | PvMSP3.10 Primers / SZ cDNA                   | 3.48                   | G11  | 29.9 | PvMSP3.10 Primers / SZ cDNA                   | 3.03                   | 3.26                           | 0.32  |
| F12  | 30.7 | PvMSP3.11 Primers / SZ cDNA                   | 2.64                   | G12  | 31.2 | PvMSP3.11 Primers / SZ cDNA                   | 1.74                   | 2.19                           | 0.63  |
